# Supplementary material for: Marine introgressions and Andean uplift have driven diversification in neotropical Monkey tree frogs (Anura, Phyllomedusinae)
Source: PeerJ journal article supplement (doi:10.7717/peerj.17232), 2024-04-16

Legend

|   |    |   |     |   |     |   |     |   |      |   |      |   |      |   |      |   |      |   |      |   |      |
|---|----|---|-----|---|-----|---|-----|---|------|---|------|---|------|---|------|---|------|---|------|---|------|
| □ | —  | ■ | IJ  | ■ | BDH | ■ | DEJ | ■ | HJK  | ■ | ACGH | ■ | AFIJ | ■ | BDFK | ■ | CDEF | ■ | CGKL | ■ | EFHJ |
| ■ | A  | ■ | IK  | ■ | BDI | ■ | DEK | ■ | HJL  | ■ | ACGI | ■ | AFIK | ■ | BDFL | ■ | CDEG | ■ | CHIJ | ■ | EFHK |
| ■ | B  | ■ | IL  | ■ | BDJ | ■ | DEL | ■ | HKL  | ■ | ACGJ | ■ | AFIL | ■ | BDGH | ■ | CDEH | ■ | CHIK | ■ | EFHL |
| ■ | C  | ■ | JK  | ■ | BDK | ■ | DFG | ■ | IJK  | ■ | ACGK | ■ | AFJK | ■ | BDGI | ■ | CDEI | ■ | CHIL | ■ | EFIJ |
| ■ | D  | ■ | JL  | ■ | BDL | ■ | DFH | ■ | IJL  | ■ | ACGL | ■ | AFJL | ■ | BDGJ | ■ | CDEJ | ■ | CHJK | ■ | EFIK |
| ■ | E  | ■ | KL  | ■ | BEF | ■ | DFI | ■ | IKL  | ■ | ACHI | ■ | AFKL | ■ | BDGK | ■ | CDEK | ■ | CHJL | ■ | EFIL |
| ■ | F  | ■ | ABC | ■ | BEG | ■ | DFJ | ■ | JKL  | ■ | ACHJ | ■ | AGHI | ■ | BDGL | ■ | CDEL | ■ | CHKL | ■ | EFJK |
| ■ | G  | ■ | ABD | ■ | BEH | ■ | DFK | ■ | ABCD | ■ | ACHK | ■ | AGHJ | ■ | BDHI | ■ | CDFG | ■ | CIJK | ■ | EFJL |
| ■ | H  | ■ | ABE | ■ | BEI | ■ | DFL | ■ | ABCE | ■ | ACHL | ■ | AGHK | ■ | BDHJ | ■ | CDFH | ■ | CIJL | ■ | EFKL |
| ■ | I  | ■ | ABF | ■ | BEJ | ■ | DGH | ■ | ABCF | ■ | ACIJ | ■ | AGHL | ■ | BDHK | ■ | CDFI | ■ | CIKL | ■ | EGHI |
| ■ | J  | ■ | ABG | ■ | BEK | ■ | DGI | ■ | ABCG | ■ | ACIK | ■ | AGIJ | ■ | BDHL | ■ | CDFJ | ■ | CJKL | ■ | EGHJ |
| ■ | K  | ■ | ABH | ■ | BEL | ■ | DGJ | ■ | ABCH | ■ | ACIL | ■ | AGIK | ■ | BDIJ | ■ | CDFK | ■ | DEFG | ■ | EGHK |
| ■ | L  | ■ | ABI | ■ | BFG | ■ | DGK | ■ | ABCI | ■ | ACJK | ■ | AGIL | ■ | BDIK | ■ | CDFL | ■ | DEFH | ■ | EGHL |
| ■ | AB | ■ | ABJ | ■ | BFH | ■ | DGL | ■ | ABCJ | ■ | ACJL | ■ | AGJK | ■ | BDIL | ■ | CDGH | ■ | DEFI | ■ | EGIJ |
| ■ | AC | ■ | ABK | ■ | BFI | ■ | DHI | ■ | ABCK | ■ | ACKL | ■ | AGJL | ■ | BDJK | ■ | CDGI | ■ | DEFJ | ■ | EGIK |
| ■ | AD | ■ | ABL | ■ | BFJ | ■ | DHJ | ■ | ABCL | ■ | ADEF | ■ | AGKL | ■ | BDJL | ■ | CDGJ | ■ | DEFK | ■ | EGIL |
| ■ | AE | ■ | ACD | ■ | BFK | ■ | DHK | ■ | ABDE | ■ | ADEG | ■ | AHIJ | ■ | BDKL | ■ | CDGK | ■ | DEFL | ■ | EGJK |
| ■ | AF | ■ | ACE | ■ | BFL | ■ | DHL | ■ | ABDF | ■ | ADEH | ■ | AHIK | ■ | BDFG | ■ | CDGL | ■ | DEGH | ■ | EGJL |
| ■ | AG | ■ | ACF | ■ | BGH | ■ | DIJ | ■ | ABDG | ■ | ADEI | ■ | AHIL | ■ | BEFH | ■ | CDHI | ■ | DEGI | ■ | EGKL |
| ■ | AH | ■ | ACG | ■ | BGI | ■ | DIK | ■ | ABDH | ■ | ADEJ | ■ | AHJK | ■ | BEFI | ■ | CDHJ | ■ | DEGJ | ■ | EHIJ |
| ■ | AI | ■ | ACH | ■ | BGJ | ■ | DIL | ■ | ABDI | ■ | ADEK | ■ | AHJL | ■ | BEFJ | ■ | CDHK | ■ | DEGK | ■ | EHIK |
| ■ | AJ | ■ | ACI | ■ | BGK | ■ | DJK | ■ | ABDJ | ■ | ADEL | ■ | AHKL | ■ | BEFK | ■ | CDHL | ■ | DEGL | ■ | EHIL |
| ■ | AK | ■ | ACJ | ■ | BGL | ■ | DJL | ■ | ABDK | ■ | ADFG | ■ | AIJK | ■ | BEFL | ■ | CDIJ | ■ | DEHI | ■ | EHJK |
| ■ | AL | ■ | ACK | ■ | BHI | ■ | DKL | ■ | ABDL | ■ | ADFH | ■ | AIJL | ■ | BEGH | ■ | CDIK | ■ | DEHJ | ■ | EHJL |
| ■ | BC | ■ | ACL | ■ | BHJ | ■ | EFG | ■ | ABEF | ■ | ADFI | ■ | AIKL | ■ | BEGI | ■ | CDIL | ■ | DEHK | ■ | EHLK |
| ■ | BD | ■ | ADE | ■ | BHK | ■ | EFH | ■ | ABEG | ■ | ADFK | ■ | AJKL | ■ | BEGJ | ■ | CDJK | ■ | DEHL | ■ | EIJK |
| ■ | BE | ■ | ADF | ■ | BHL | ■ | EFI | ■ | ABEH | ■ | ADFL | ■ | BCDE | ■ | BEGK | ■ | CDJL | ■ | DEIL | ■ | EIJL |
| ■ | BF | ■ | ADG | ■ | BIJ | ■ | EFJ | ■ | ABEI | ■ | ADFL | ■ | BCDE | ■ | BEGK | ■ | CDJL | ■ | DEIL | ■ | EIJL |
| ■ | BG | ■ | ADH | ■ | BIK | ■ | EFK | ■ | ABEJ | ■ | ADGH | ■ | BCDG | ■ | BEHI | ■ | CEFG | ■ | DEIL | ■ | EJKL |
| ■ | BH | ■ | ADI | ■ | BIL | ■ | EFL | ■ | ABEK | ■ | ADGI | ■ | BCDH | ■ | BEHJ | ■ | CEFH | ■ | DEJK | ■ | FGHI |
| ■ | BI | ■ | ADJ | ■ | BJK | ■ | EGH | ■ | ABEL | ■ | ADGJ | ■ | BCDI | ■ | BEHK | ■ | CEFI | ■ | DEJL | ■ | FGHJ |
| ■ | BJ | ■ | ADK | ■ | BJL | ■ | EGI | ■ | ABFG | ■ | ADGK | ■ | BCDJ | ■ | BEHL | ■ | CEFJ | ■ | DEKL | ■ | FGHK |
| ■ | BK | ■ | ADL | ■ | BKL | ■ | EGJ | ■ | ABFH | ■ | ADGL | ■ | BCDK | ■ | BEIJ | ■ | CEFK | ■ | DFGH | ■ | FGHL |
| ■ | BL | ■ | AEF | ■ | CDE | ■ | EGK | ■ | ABFI | ■ | ADHI | ■ | BCDL | ■ | BEIK | ■ | CEFL | ■ | DFGI | ■ | FGIJ |
| ■ | CD | ■ | AEG | ■ | CDF | ■ | EGL | ■ | ABFJ | ■ | ADHJ | ■ | BCEF | ■ | BEIL | ■ | CEGH | ■ | DFGJ | ■ | FGIK |
| ■ | CE | ■ | AEH | ■ | CDG | ■ | EHI | ■ | ABFK | ■ | ADHK | ■ | BCEG | ■ | BEJK | ■ | CEGI | ■ | DFGK | ■ | FGIL |
| ■ | CF | ■ | AEI | ■ | CDH | ■ | EHJ | ■ | ABFL | ■ | ADHL | ■ | BCEH | ■ | BEJL | ■ | CEGJ | ■ | DFGL | ■ | FGJK |
| ■ | CG | ■ | AEJ | ■ | CDI | ■ | EHK | ■ | ABGH | ■ | ADIJ | ■ | BCEI | ■ | BEKL | ■ | CEGK | ■ | DFHJ | ■ | FGJL |
| ■ | CH | ■ | AEK | ■ | CDJ | ■ | EHL | ■ | ABGI | ■ | ADIK | ■ | BCEJ | ■ | BFGH | ■ | CEGL | ■ | DFHJ | ■ | FGKL |
| ■ | CI | ■ | AEL | ■ | CDK | ■ | EIJ | ■ | ABGJ | ■ | ADIL | ■ | BCEK | ■ | BFGI | ■ | CEHI | ■ | DFHK | ■ | FHIJ |
| ■ | CJ | ■ | AFG | ■ | CDL | ■ | EIK | ■ | ABGK | ■ | ADJK | ■ | BCEL | ■ | BFGJ | ■ | CEHJ | ■ | DFHL | ■ | FHIK |
| ■ | CK | ■ | AFH | ■ | CEF | ■ | EIL | ■ | ABGL | ■ | ADJL | ■ | BCFG | ■ | BFGK | ■ | CEHK | ■ | DFIJ | ■ | FHIL |
| ■ | CL | ■ | AFI | ■ | CEG | ■ | EJK | ■ | ABHI | ■ | ADKL | ■ | BCFH | ■ | BFGL | ■ | CEHL | ■ | DFIK | ■ | FHJK |
| ■ | DE | ■ | AFJ | ■ | CEH | ■ | EJL | ■ | ABHJ | ■ | AEEG | ■ | BCFI | ■ | BFHI | ■ | CEIJ | ■ | DFIL | ■ | FHJL |
| ■ | DF | ■ | AFK | ■ | CEI | ■ | EKL | ■ | ABHK | ■ | AEFH | ■ | BCFJ | ■ | BFHJ | ■ | CEIK | ■ | DFJK | ■ | FHKL |
| ■ | DG | ■ | AFL | ■ | CEJ | ■ | FGH | ■ | ABHL | ■ | AEFI | ■ | BCFK | ■ | BFHK | ■ | CEIL | ■ | DFJL | ■ | FIJK |
| ■ | DH | ■ | AGH | ■ | CEK | ■ | FGI | ■ | ABIJ | ■ | AEFJ | ■ | BCFL | ■ | BFHL | ■ | CEJK | ■ | DFKL | ■ | FIJL |
| ■ | DI | ■ | AGI | ■ | CEL | ■ | FGJ | ■ | ABIK | ■ | AEFK | ■ | BCGH | ■ | BFIJ | ■ | CEJL | ■ | DGHI | ■ | FIKL |
| ■ | DJ | ■ | AGJ | ■ | CFG | ■ | FGK | ■ | ABIL | ■ | AEFL | ■ | BCGI | ■ | BFIK | ■ | CEKL | ■ | DGHJ | ■ | FJKL |
| ■ | DK | ■ | AGK | ■ | CFH | ■ | FGL | ■ | ABJK | ■ | AEGH | ■ | BCGJ | ■ | BFIL | ■ | CFGH | ■ | DGHK | ■ | GHIJ |
| ■ | DL | ■ | AGL | ■ | CFI | ■ | FHI | ■ | ABJL | ■ | AEGI | ■ | BCGK | ■ | BFJK | ■ | CFGJ | ■ | DGHL | ■ | GHIK |
| ■ | EF | ■ | AHI | ■ | CFJ | ■ | FHJ | ■ | ABKL | ■ | AEGJ | ■ | BCGL | ■ | BFJL | ■ | CFGK | ■ | DGIJ | ■ | GHIL |
| ■ | EG | ■ | AHJ | ■ | CFK | ■ | FHK | ■ | ACDE | ■ | AEGK | ■ | BCHI | ■ | BFKL | ■ | CFGK | ■ | DGIK | ■ | GHIK |
| ■ | EH | ■ | AHK | ■ | CFL | ■ | FHL | ■ | ACDF | ■ | AEGL | ■ | BCHJ | ■ | BGHI | ■ | CFGJ | ■ | DGIL | ■ | GHIK |
| ■ | EI | ■ | AHL | ■ | CGH | ■ | FIJ | ■ | ACDG | ■ | AEHI | ■ | BCHK | ■ | BGHJ | ■ | CFHI | ■ | DGJK | ■ | GHLK |
| ■ | EJ | ■ | AIJ | ■ | CGI | ■ | FIK | ■ | ACDH | ■ | AEHJ | ■ | BCHL | ■ | BGHK | ■ | CFHJ | ■ | DGJL | ■ | GIJK |
| ■ | EK | ■ | AIK | ■ | CGJ | ■ | FIL | ■ | ACDI | ■ | AEHK | ■ | BCIJ | ■ | BGHL | ■ | CFHK | ■ | DGKL | ■ | GIJL |
| ■ | EL | ■ | AIL | ■ | CGK | ■ | FJK | ■ | ACDJ | ■ | AEHL | ■ | BCIK | ■ | BGIJ | ■ | CFHL | ■ | DHIJ | ■ | GIKL |
| ■ | FG | ■ | AJK | ■ | CGL | ■ | FJL | ■ | ACDK | ■ | AEIJ | ■ | BCIL | ■ | BGIK | ■ | CFIJ | ■ | DHIK | ■ | GJKL |
| ■ | FH | ■ | AJL | ■ | CHI | ■ | FKL | ■ | ACDL | ■ | AEIK | ■ | BCJK | ■ | BGIL | ■ | CFIK | ■ | DHIL | ■ | HIJK |
| ■ | FI | ■ | AKL | ■ | CHJ | ■ | GHI | ■ | ACEF | ■ | AEIL | ■ | BCJL | ■ | BGJK | ■ | CFIL | ■ | DHJK | ■ | HIJL |
| ■ | FJ | ■ | BCD | ■ | CHK | ■ | GHJ | ■ | ACEG | ■ | AEJK | ■ | BCKL | ■ | BGJL | ■ | CFJK | ■ | DHJL | ■ | HIKL |
| ■ | FK | ■ | BCE | ■ | CHL | ■ | GHK | ■ | ACEH | ■ | AEJL | ■ | BDEF | ■ | BGKL | ■ | CFJL | ■ | DHKL | ■ | HJKL |
| ■ | FL | ■ | BCF | ■ | CIJ | ■ | GHL | ■ | ACEI | ■ | AEKL | ■ | BDEG | ■ | BHIJ | ■ | CFKL | ■ | DIJK | ■ | IJKL |
| ■ | GH | ■ | BCG | ■ | CIK | ■ | GIJ | ■ | ACEJ | ■ | AFGH | ■ | BDEH | ■ | BHIK | ■ | CGHI | ■ | DIJL | ■ |      |
| ■ | GI | ■ | BCH | ■ | CIL | ■ | GIL | ■ | ACEK | ■ | AFGI | ■ | BDEI | ■ | BHIL | ■ | CGHJ | ■ | DIKL | ■ |      |
| ■ | GJ | ■ | BCI | ■ | CJK | ■ | GJK | ■ | ACEL | ■ | AFGJ | ■ | BDEJ | ■ | BHJK | ■ | CGHK | ■ | DJKL | ■ |      |
| ■ | GK | ■ | BCJ | ■ | CJL | ■ | GJK | ■ | ACFG | ■ | AFGK | ■ | BDEK | ■ | BHJL | ■ | CGHL | ■ | EFGH | ■ |      |
| ■ | GL | ■ | BCK | ■ | CKL | ■ | GJL | ■ | ACFH | ■ | AFGL | ■ | BDEL | ■ | BHKL | ■ | CGIJ | ■ | EFGI | ■ |      |
| ■ | HI | ■ | BCL | ■ | DEF | ■ | GKL | ■ | ACFI | ■ | AFHI | ■ | BDFG | ■ | BIJK | ■ | CGIK | ■ | EFGJ | ■ |      |
| ■ | HJ | ■ | BDE | ■ | DEG | ■ | HIJ | ■ | ACFJ | ■ | AFHJ | ■ | BDFH | ■ | BIJL | ■ | CGIL | ■ | EFGK | ■ |      |
| ■ | HK | ■ | BDF | ■ | DEH | ■ | HIK | ■ | ACFK | ■ | AFHK | ■ | BDFI | ■ | BIKL | ■ | CGJK | ■ | EFGL | ■ |      |
| ■ | HL | ■ | BDG | ■ | DEI | ■ | HIL | ■ | ACFL | ■ | AFHL | ■ | BDFJ | ■ | BJKL | ■ | CGJL | ■ | EFHI | ■ |      |

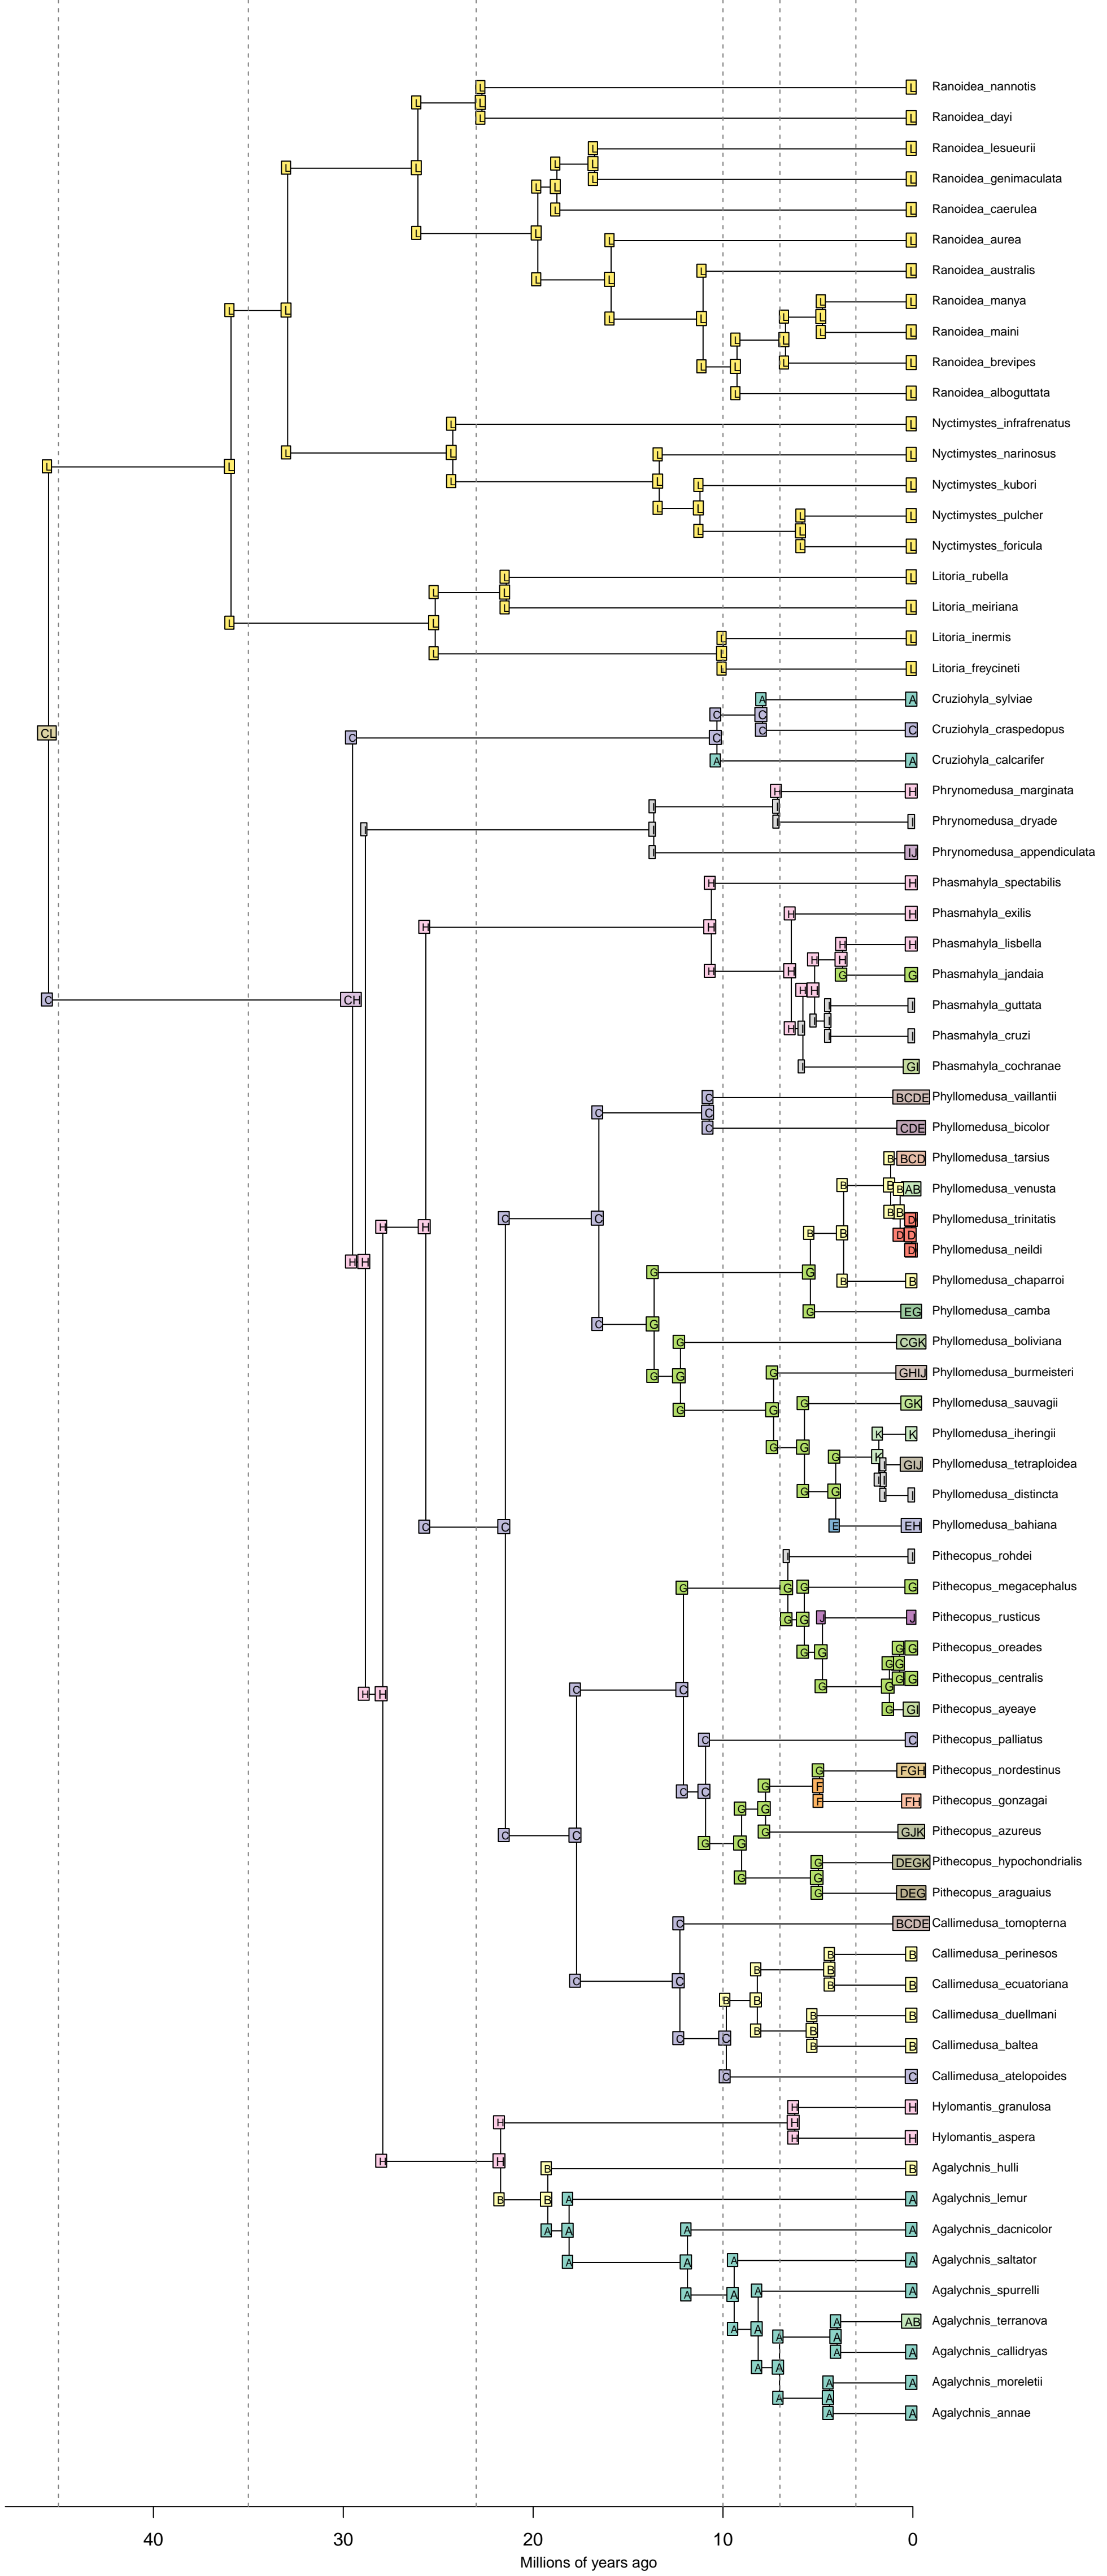

Legend

|   |    |   |     |   |     |   |     |   |      |   |      |   |      |   |      |   |      |   |      |   |      |
|---|----|---|-----|---|-----|---|-----|---|------|---|------|---|------|---|------|---|------|---|------|---|------|
| □ | —  | ■ | IJ  | ■ | BDH | ■ | DEJ | ■ | HJK  | ■ | ACGH | ■ | AFIJ | ■ | BDFK | ■ | CDEF | ■ | CGKL | ■ | EFHJ |
| ■ | A  | ■ | IK  | ■ | BDI | ■ | DEK | ■ | HJL  | ■ | ACGI | ■ | AFIK | ■ | BDFL | ■ | CDEG | ■ | CHIJ | ■ | EFHK |
| ■ | B  | ■ | IL  | ■ | BDJ | ■ | DEL | ■ | HKL  | ■ | ACGJ | ■ | AFIL | ■ | BDGH | ■ | CDEH | ■ | CHIK | ■ | EFHL |
| ■ | C  | ■ | JK  | ■ | BDK | ■ | DFG | ■ | IJK  | ■ | ACGK | ■ | AFJK | ■ | BDGI | ■ | CDEI | ■ | CHIL | ■ | EFIJ |
| ■ | D  | ■ | JL  | ■ | BDL | ■ | DFH | ■ | IJL  | ■ | ACGL | ■ | AFJL | ■ | BDGJ | ■ | CDEJ | ■ | CHJK | ■ | EFIK |
| ■ | E  | ■ | KL  | ■ | BEF | ■ | DFI | ■ | IKL  | ■ | ACHI | ■ | AFKL | ■ | BDGK | ■ | CDEK | ■ | CHJL | ■ | EFIL |
| ■ | F  | ■ | ABC | ■ | BEG | ■ | DFJ | ■ | JKL  | ■ | ACHJ | ■ | AGHI | ■ | BDGL | ■ | CDEL | ■ | CHKL | ■ | EFJK |
| ■ | G  | ■ | ABD | ■ | BEH | ■ | DFK | ■ | ABCD | ■ | ACHK | ■ | AGHJ | ■ | BDHI | ■ | CDFG | ■ | CIJK | ■ | EFJL |
| ■ | H  | ■ | ABE | ■ | BEI | ■ | DFL | ■ | ABCE | ■ | ACHL | ■ | AGHK | ■ | BDHJ | ■ | CDFH | ■ | CIJL | ■ | EFKL |
| ■ | I  | ■ | ABF | ■ | BEJ | ■ | DGH | ■ | ABCF | ■ | ACIJ | ■ | AGHL | ■ | BDHK | ■ | CDFI | ■ | CIKL | ■ | EGHI |
| ■ | J  | ■ | ABG | ■ | BEK | ■ | DGI | ■ | ABCG | ■ | ACIK | ■ | AGIJ | ■ | BDHL | ■ | CDFJ | ■ | CJKL | ■ | EGHJ |
| ■ | K  | ■ | ABH | ■ | BEL | ■ | DGJ | ■ | ABCH | ■ | ACIL | ■ | AGIK | ■ | BDIJ | ■ | CDFK | ■ | DEFG | ■ | EGHK |
| ■ | L  | ■ | ABI | ■ | BFG | ■ | DGK | ■ | ABCI | ■ | ACJK | ■ | AGIL | ■ | BDIK | ■ | CDFL | ■ | DEFH | ■ | EGHL |
| ■ | AB | ■ | ABJ | ■ | BFH | ■ | DGL | ■ | ABCJ | ■ | ACJL | ■ | AGJK | ■ | BDIL | ■ | CDGH | ■ | DEFI | ■ | EGIJ |
| ■ | AC | ■ | ABK | ■ | BFI | ■ | DHI | ■ | ABCK | ■ | ACKL | ■ | AGJL | ■ | BDJK | ■ | CDGI | ■ | DEFJ | ■ | EGIK |
| ■ | AD | ■ | ABL | ■ | BFJ | ■ | DHJ | ■ | ABCL | ■ | ADEF | ■ | AGKL | ■ | BDJL | ■ | CDGJ | ■ | DEFK | ■ | EGIL |
| ■ | AE | ■ | ACD | ■ | BFK | ■ | DHK | ■ | ABDE | ■ | ADEG | ■ | AHIJ | ■ | BDKL | ■ | CDGK | ■ | DEFL | ■ | EGJK |
| ■ | AF | ■ | ACE | ■ | BFL | ■ | DHL | ■ | ABDF | ■ | ADEH | ■ | AHIK | ■ | BDFG | ■ | CDGL | ■ | DEGH | ■ | EGJL |
| ■ | AG | ■ | ACF | ■ | BGH | ■ | DIJ | ■ | ABDG | ■ | ADEI | ■ | AHIL | ■ | BEFH | ■ | CDHI | ■ | DEGI | ■ | EGKL |
| ■ | AH | ■ | ACG | ■ | BGI | ■ | DIK | ■ | ABDH | ■ | ADEJ | ■ | AHJK | ■ | BEFI | ■ | CDHJ | ■ | DEGJ | ■ | EHIJ |
| ■ | AI | ■ | ACH | ■ | BGJ | ■ | DIL | ■ | ABDI | ■ | ADEK | ■ | AHJL | ■ | BEFJ | ■ | CDHK | ■ | DEGK | ■ | EHIK |
| ■ | AJ | ■ | ACI | ■ | BGK | ■ | DJK | ■ | ABDJ | ■ | ADEL | ■ | AHKL | ■ | BEFK | ■ | CDHL | ■ | DEGL | ■ | EHIL |
| ■ | AK | ■ | ACJ | ■ | BGL | ■ | DJL | ■ | ABDK | ■ | ADFG | ■ | AIJK | ■ | BEFL | ■ | CDIJ | ■ | DEHI | ■ | EHJK |
| ■ | AL | ■ | ACK | ■ | BHI | ■ | DKL | ■ | ABDL | ■ | ADFH | ■ | AIJL | ■ | BEGH | ■ | CDIK | ■ | DEHJ | ■ | EHJL |
| ■ | BC | ■ | ACL | ■ | BHJ | ■ | EFG | ■ | ABEF | ■ | ADFI | ■ | AIKL | ■ | BEGI | ■ | CDIL | ■ | DEHK | ■ | EHLK |
| ■ | BD | ■ | ADE | ■ | BHK | ■ | EFH | ■ | ABEG | ■ | ADFK | ■ | AJKL | ■ | BEGJ | ■ | CDJK | ■ | DEHL | ■ | EIJK |
| ■ | BE | ■ | ADF | ■ | BHL | ■ | EFI | ■ | ABEH | ■ | ADFL | ■ | BCDE | ■ | BEGK | ■ | CDJL | ■ | DEIL | ■ | EIJL |
| ■ | BF | ■ | ADG | ■ | BIJ | ■ | EFJ | ■ | ABEI | ■ | ADFL | ■ | BCDE | ■ | BEGK | ■ | CDJL | ■ | DEIL | ■ | EIJL |
| ■ | BG | ■ | ADH | ■ | BIK | ■ | EFK | ■ | ABEJ | ■ | ADGH | ■ | BCDG | ■ | BEHI | ■ | CEFG | ■ | DEIL | ■ | EJKL |
| ■ | BH | ■ | ADI | ■ | BIL | ■ | EFL | ■ | ABEK | ■ | ADGI | ■ | BCDH | ■ | BEHJ | ■ | CEFH | ■ | DEJK | ■ | FGHI |
| ■ | BI | ■ | ADJ | ■ | BJK | ■ | EGH | ■ | ABEL | ■ | ADGJ | ■ | BCDI | ■ | BEHK | ■ | CEFI | ■ | DEJL | ■ | FGHJ |
| ■ | BJ | ■ | ADK | ■ | BJL | ■ | EGI | ■ | ABFG | ■ | ADGK | ■ | BCDJ | ■ | BEHL | ■ | CEFJ | ■ | DEKL | ■ | FGHK |
| ■ | BK | ■ | ADL | ■ | BKL | ■ | EGJ | ■ | ABFH | ■ | ADGL | ■ | BCDK | ■ | BEIJ | ■ | CEFK | ■ | DFGH | ■ | FGHL |
| ■ | BL | ■ | AEF | ■ | CDE | ■ | EGK | ■ | ABFI | ■ | ADHI | ■ | BCDL | ■ | BEIK | ■ | CEFL | ■ | DFGI | ■ | FGIJ |
| ■ | CD | ■ | AEG | ■ | CDF | ■ | EGL | ■ | ABFJ | ■ | ADHJ | ■ | BCEF | ■ | BEIL | ■ | CEGH | ■ | DFGJ | ■ | FGIK |
| ■ | CE | ■ | AEH | ■ | CDG | ■ | EHI | ■ | ABFK | ■ | ADHK | ■ | BCEG | ■ | BEJK | ■ | CEGI | ■ | DFGK | ■ | FGIL |
| ■ | CF | ■ | AEI | ■ | CDH | ■ | EHJ | ■ | ABFL | ■ | ADHL | ■ | BCEH | ■ | BEJL | ■ | CEGJ | ■ | DFGL | ■ | FGJK |
| ■ | CG | ■ | AEJ | ■ | CDI | ■ | EHK | ■ | ABGH | ■ | ADIJ | ■ | BCEI | ■ | BEKL | ■ | CEGK | ■ | DFHJ | ■ | FGJL |
| ■ | CH | ■ | AEK | ■ | CDJ | ■ | EHL | ■ | ABGI | ■ | ADIK | ■ | BCEJ | ■ | BFGH | ■ | CEGL | ■ | DFHJ | ■ | FGKL |
| ■ | CI | ■ | AEL | ■ | CDK | ■ | EIJ | ■ | ABGJ | ■ | ADIL | ■ | BCEK | ■ | BFGI | ■ | CEHI | ■ | DFHK | ■ | FHIJ |
| ■ | CJ | ■ | AFG | ■ | CDL | ■ | EIK | ■ | ABGK | ■ | ADJK | ■ | BCEL | ■ | BFGJ | ■ | CEHJ | ■ | DFHL | ■ | FHIK |
| ■ | CK | ■ | AFH | ■ | CEF | ■ | EIL | ■ | ABGL | ■ | ADJL | ■ | BCFG | ■ | BFGK | ■ | CEHK | ■ | DFIJ | ■ | FHIL |
| ■ | CL | ■ | AFI | ■ | CEG | ■ | EJK | ■ | ABHI | ■ | ADKL | ■ | BCFH | ■ | BFGL | ■ | CEHL | ■ | DFIK | ■ | FHJK |
| ■ | DE | ■ | AFJ | ■ | CEH | ■ | EJL | ■ | ABHJ | ■ | AEEG | ■ | BCFI | ■ | BFHI | ■ | CEIJ | ■ | DFIL | ■ | FHJL |
| ■ | DF | ■ | AFK | ■ | CEI | ■ | EKL | ■ | ABHK | ■ | AEFH | ■ | BCFJ | ■ | BFHJ | ■ | CEIK | ■ | DFJK | ■ | FHKL |
| ■ | DG | ■ | AFL | ■ | CEJ | ■ | FGH | ■ | ABHL | ■ | AEFI | ■ | BCFK | ■ | BFHK | ■ | CEIL | ■ | DFJL | ■ | FIJK |
| ■ | DH | ■ | AGH | ■ | CEK | ■ | FGI | ■ | ABIJ | ■ | AEFJ | ■ | BCFL | ■ | BFHL | ■ | CEJK | ■ | DFKL | ■ | FIJL |
| ■ | DI | ■ | AGI | ■ | CEL | ■ | FGJ | ■ | ABIK | ■ | AEFK | ■ | BCGH | ■ | BFIJ | ■ | CEJL | ■ | DGHI | ■ | FIKL |
| ■ | DJ | ■ | AGJ | ■ | CFG | ■ | FGK | ■ | ABIL | ■ | AEFL | ■ | BCGI | ■ | BFIK | ■ | CEKL | ■ | DGHJ | ■ | FJKL |
| ■ | DK | ■ | AGK | ■ | CFH | ■ | FGL | ■ | ABJK | ■ | AEGH | ■ | BCGJ | ■ | BFIL | ■ | CFGH | ■ | DGHK | ■ | GHIJ |
| ■ | DL | ■ | AGL | ■ | CFI | ■ | FHI | ■ | ABJL | ■ | AEGI | ■ | BCGK | ■ | BFJK | ■ | CFGJ | ■ | DGHL | ■ | GHIK |
| ■ | EF | ■ | AHI | ■ | CFJ | ■ | FHJ | ■ | ABKL | ■ | AEGJ | ■ | BCGL | ■ | BFJL | ■ | CFGK | ■ | DGIJ | ■ | GHIL |
| ■ | EG | ■ | AHJ | ■ | CFK | ■ | FHK | ■ | ACDE | ■ | AEGK | ■ | BCHI | ■ | BFKL | ■ | CFGK | ■ | DGIK | ■ | GHJK |
| ■ | EH | ■ | AHK | ■ | CFL | ■ | FHL | ■ | ACDF | ■ | AEGL | ■ | BCHJ | ■ | BGHI | ■ | CFGJ | ■ | DGIL | ■ | GHJL |
| ■ | EI | ■ | AHL | ■ | CGH | ■ | FIJ | ■ | ACDG | ■ | AEHI | ■ | BCHK | ■ | BGHJ | ■ | CFHI | ■ | DGJK | ■ | GHKL |
| ■ | EJ | ■ | AIJ | ■ | CGI | ■ | FIK | ■ | ACDH | ■ | AEHJ | ■ | BCHL | ■ | BGHK | ■ | CFHJ | ■ | DGJL | ■ | GIJK |
| ■ | EK | ■ | AIK | ■ | CGJ | ■ | FIL | ■ | ACDI | ■ | AEHK | ■ | BCIJ | ■ | BGHL | ■ | CFHK | ■ | DGKL | ■ | GIJL |
| ■ | EL | ■ | AIL | ■ | CGK | ■ | FJK | ■ | ACDJ | ■ | AEHL | ■ | BCIK | ■ | BGIJ | ■ | CFHL | ■ | DHIJ | ■ | GIKL |
| ■ | FG | ■ | AJK | ■ | CGL | ■ | FJL | ■ | ACDK | ■ | AEIJ | ■ | BCIL | ■ | BGIK | ■ | CFIJ | ■ | DHIK | ■ | GJKL |
| ■ | FH | ■ | AJL | ■ | CHI | ■ | FKL | ■ | ACDL | ■ | AEIK | ■ | BCJK | ■ | BGIL | ■ | CFIK | ■ | DHIL | ■ | HIJK |
| ■ | FI | ■ | AKL | ■ | CHJ | ■ | GHI | ■ | ACEF | ■ | AEIL | ■ | BCJL | ■ | BGJK | ■ | CFIL | ■ | DHJK | ■ | HIJL |
| ■ | FJ | ■ | BCD | ■ | CHK | ■ | GHJ | ■ | ACEG | ■ | AEJK | ■ | BCKL | ■ | BGJL | ■ | CFJK | ■ | DHJL | ■ | HIKL |
| ■ | FK | ■ | BCE | ■ | CHL | ■ | GHK | ■ | ACEH | ■ | AEJL | ■ | BDEF | ■ | BGKL | ■ | CFJL | ■ | DHKL | ■ | HJKL |
| ■ | FL | ■ | BCF | ■ | CIJ | ■ | GHL | ■ | ACEI | ■ | AEKL | ■ | BDEG | ■ | BHIJ | ■ | CFKL | ■ | DIJK | ■ | IJKL |
| ■ | GH | ■ | BCG | ■ | CIK | ■ | GIJ | ■ | ACEJ | ■ | AFGH | ■ | BDEH | ■ | BHIK | ■ | CGHI | ■ | DIJL | ■ |      |
| ■ | GI | ■ | BCH | ■ | CIL | ■ | GIK | ■ | ACEK | ■ | AFGI | ■ | BDEI | ■ | BHIL | ■ | CGHJ | ■ | DIKL | ■ |      |
| ■ | GJ | ■ | BCI | ■ | CJK | ■ | GIL | ■ | ACEL | ■ | AFGJ | ■ | BDEJ | ■ | BHJK | ■ | CGHK | ■ | DJKL | ■ |      |
| ■ | GK | ■ | BCJ | ■ | CJL | ■ | GJK | ■ | ACFG | ■ | AFGK | ■ | BDEK | ■ | BHJL | ■ | CGHL | ■ | EFGH | ■ |      |
| ■ | GL | ■ | BCK | ■ | CKL | ■ | GJL | ■ | ACFH | ■ | AFGL | ■ | BDEL | ■ | BHKL | ■ | CGIJ | ■ | EFGI | ■ |      |
| ■ | HI | ■ | BCL | ■ | DEF | ■ | GKL | ■ | ACFI | ■ | AFHI | ■ | BDFG | ■ | BIJK | ■ | CGIK | ■ | EFGJ | ■ |      |
| ■ | HJ | ■ | BDE | ■ | DEG | ■ | HIJ | ■ | ACFJ | ■ | AFHJ | ■ | BDFH | ■ | BIJL | ■ | CGIL | ■ | EFGK | ■ |      |
| ■ | HK | ■ | BDF | ■ | DEH | ■ | HIK | ■ | ACFK | ■ | AFHK | ■ | BDFI | ■ | BIKL | ■ | CGJK | ■ | EFGL | ■ |      |
| ■ | HL | ■ | BDG | ■ | DEI | ■ | HIL | ■ | ACFL | ■ | AFHL | ■ | BDFJ | ■ | BJKL | ■ | CGJL | ■ | EFHI | ■ |      |

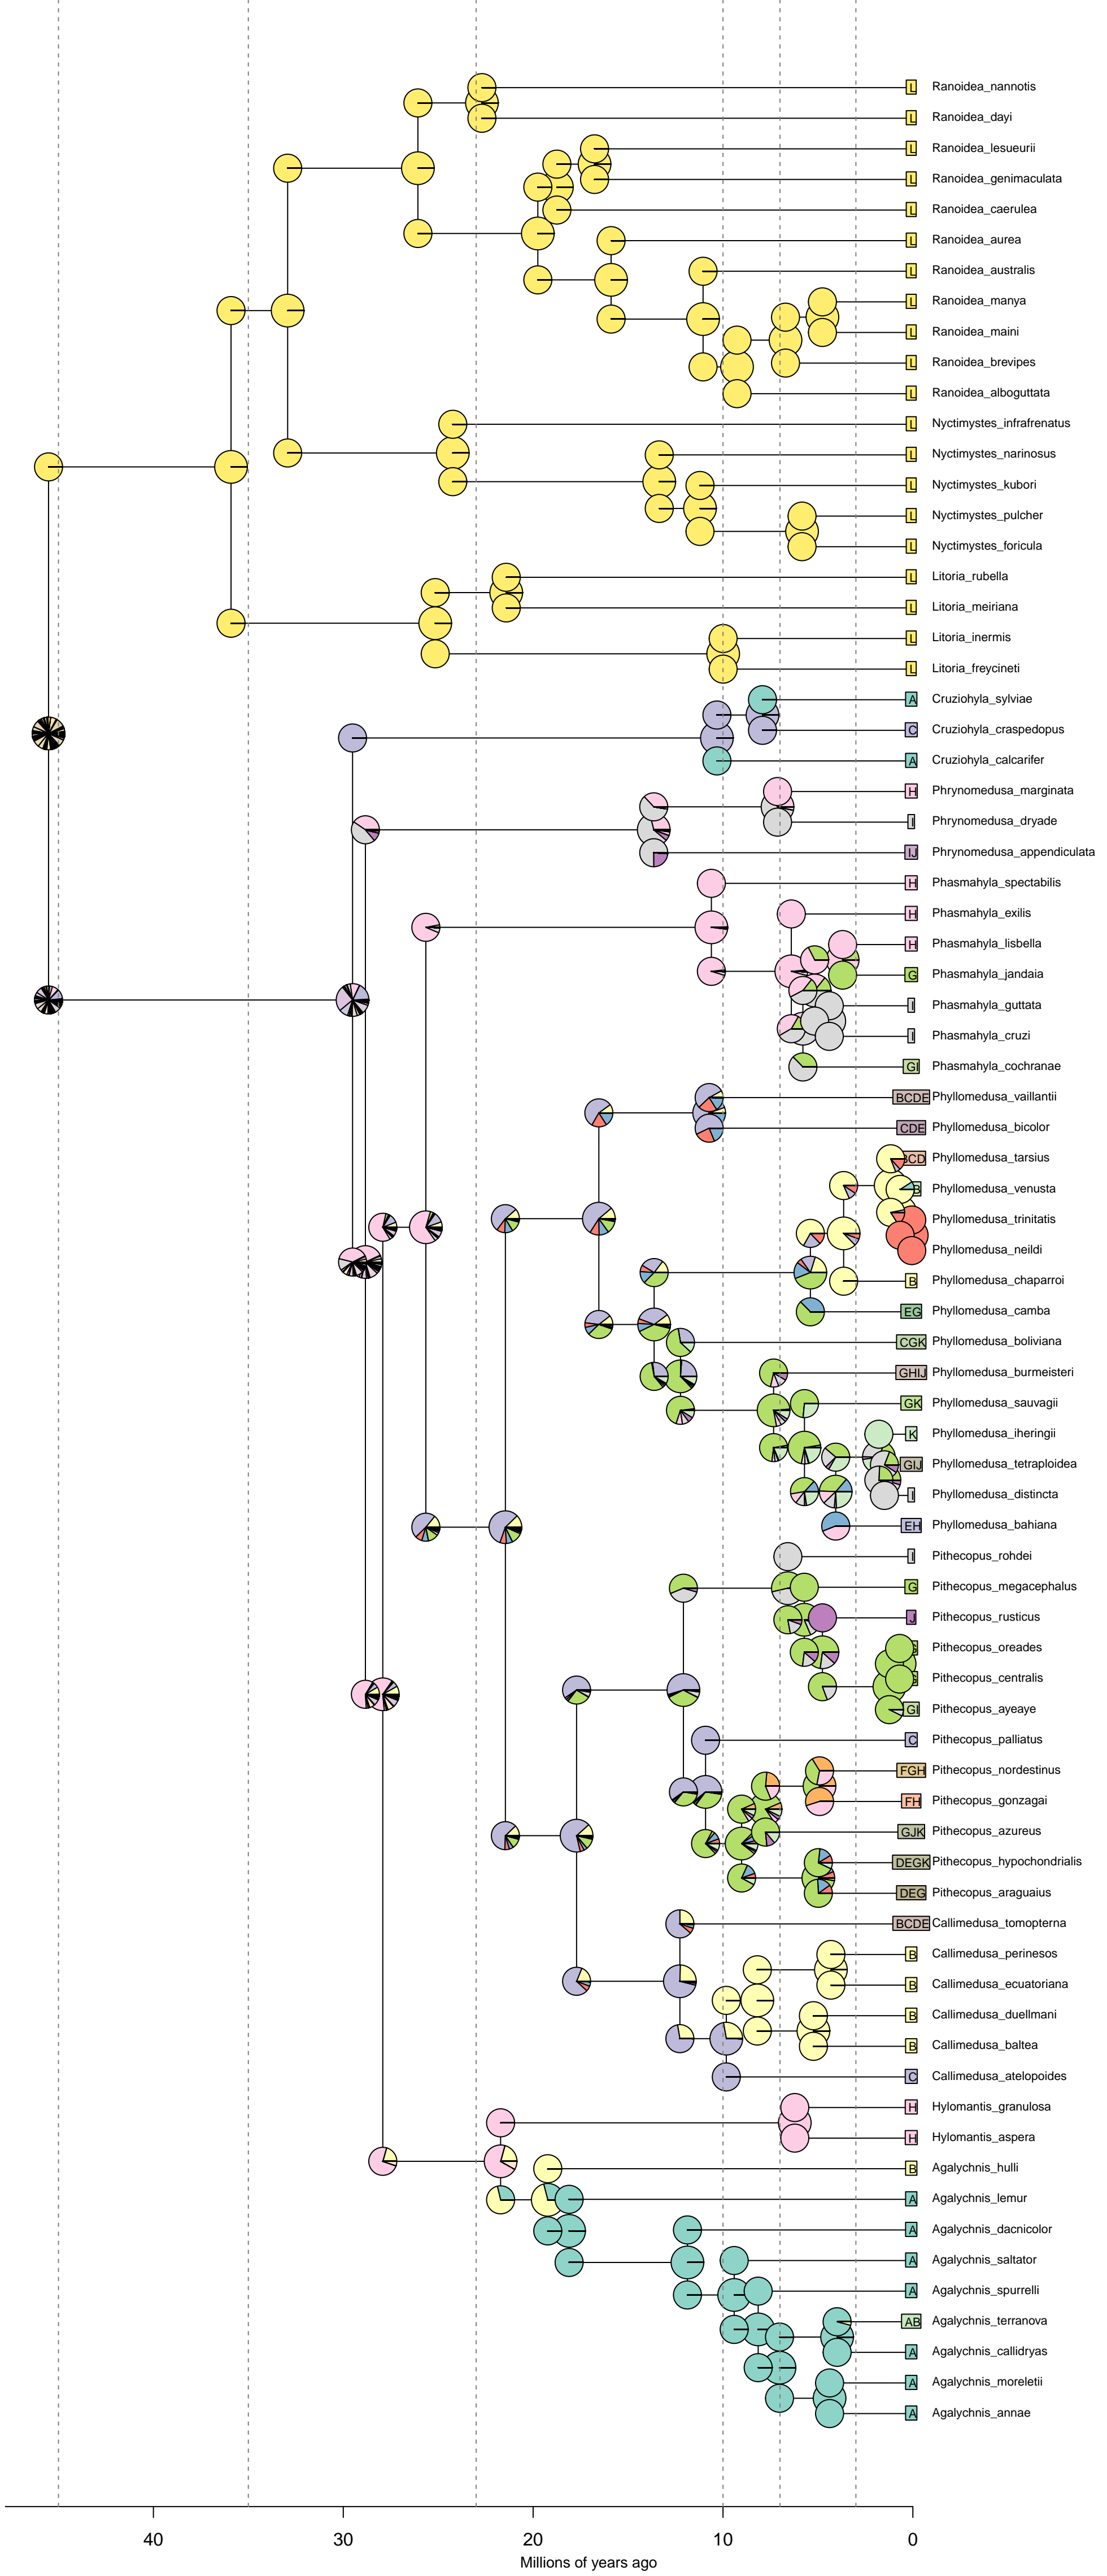

Supplement: AppendixS6.pdf [file AppendixS6.pdf]
