# Supplementary material for: Marine introgressions and Andean uplift have driven diversification in neotropical Monkey tree frogs (Anura, Phyllomedusinae)
Source: PeerJ journal article supplement (doi:10.7717/peerj.17232), 2024-04-16

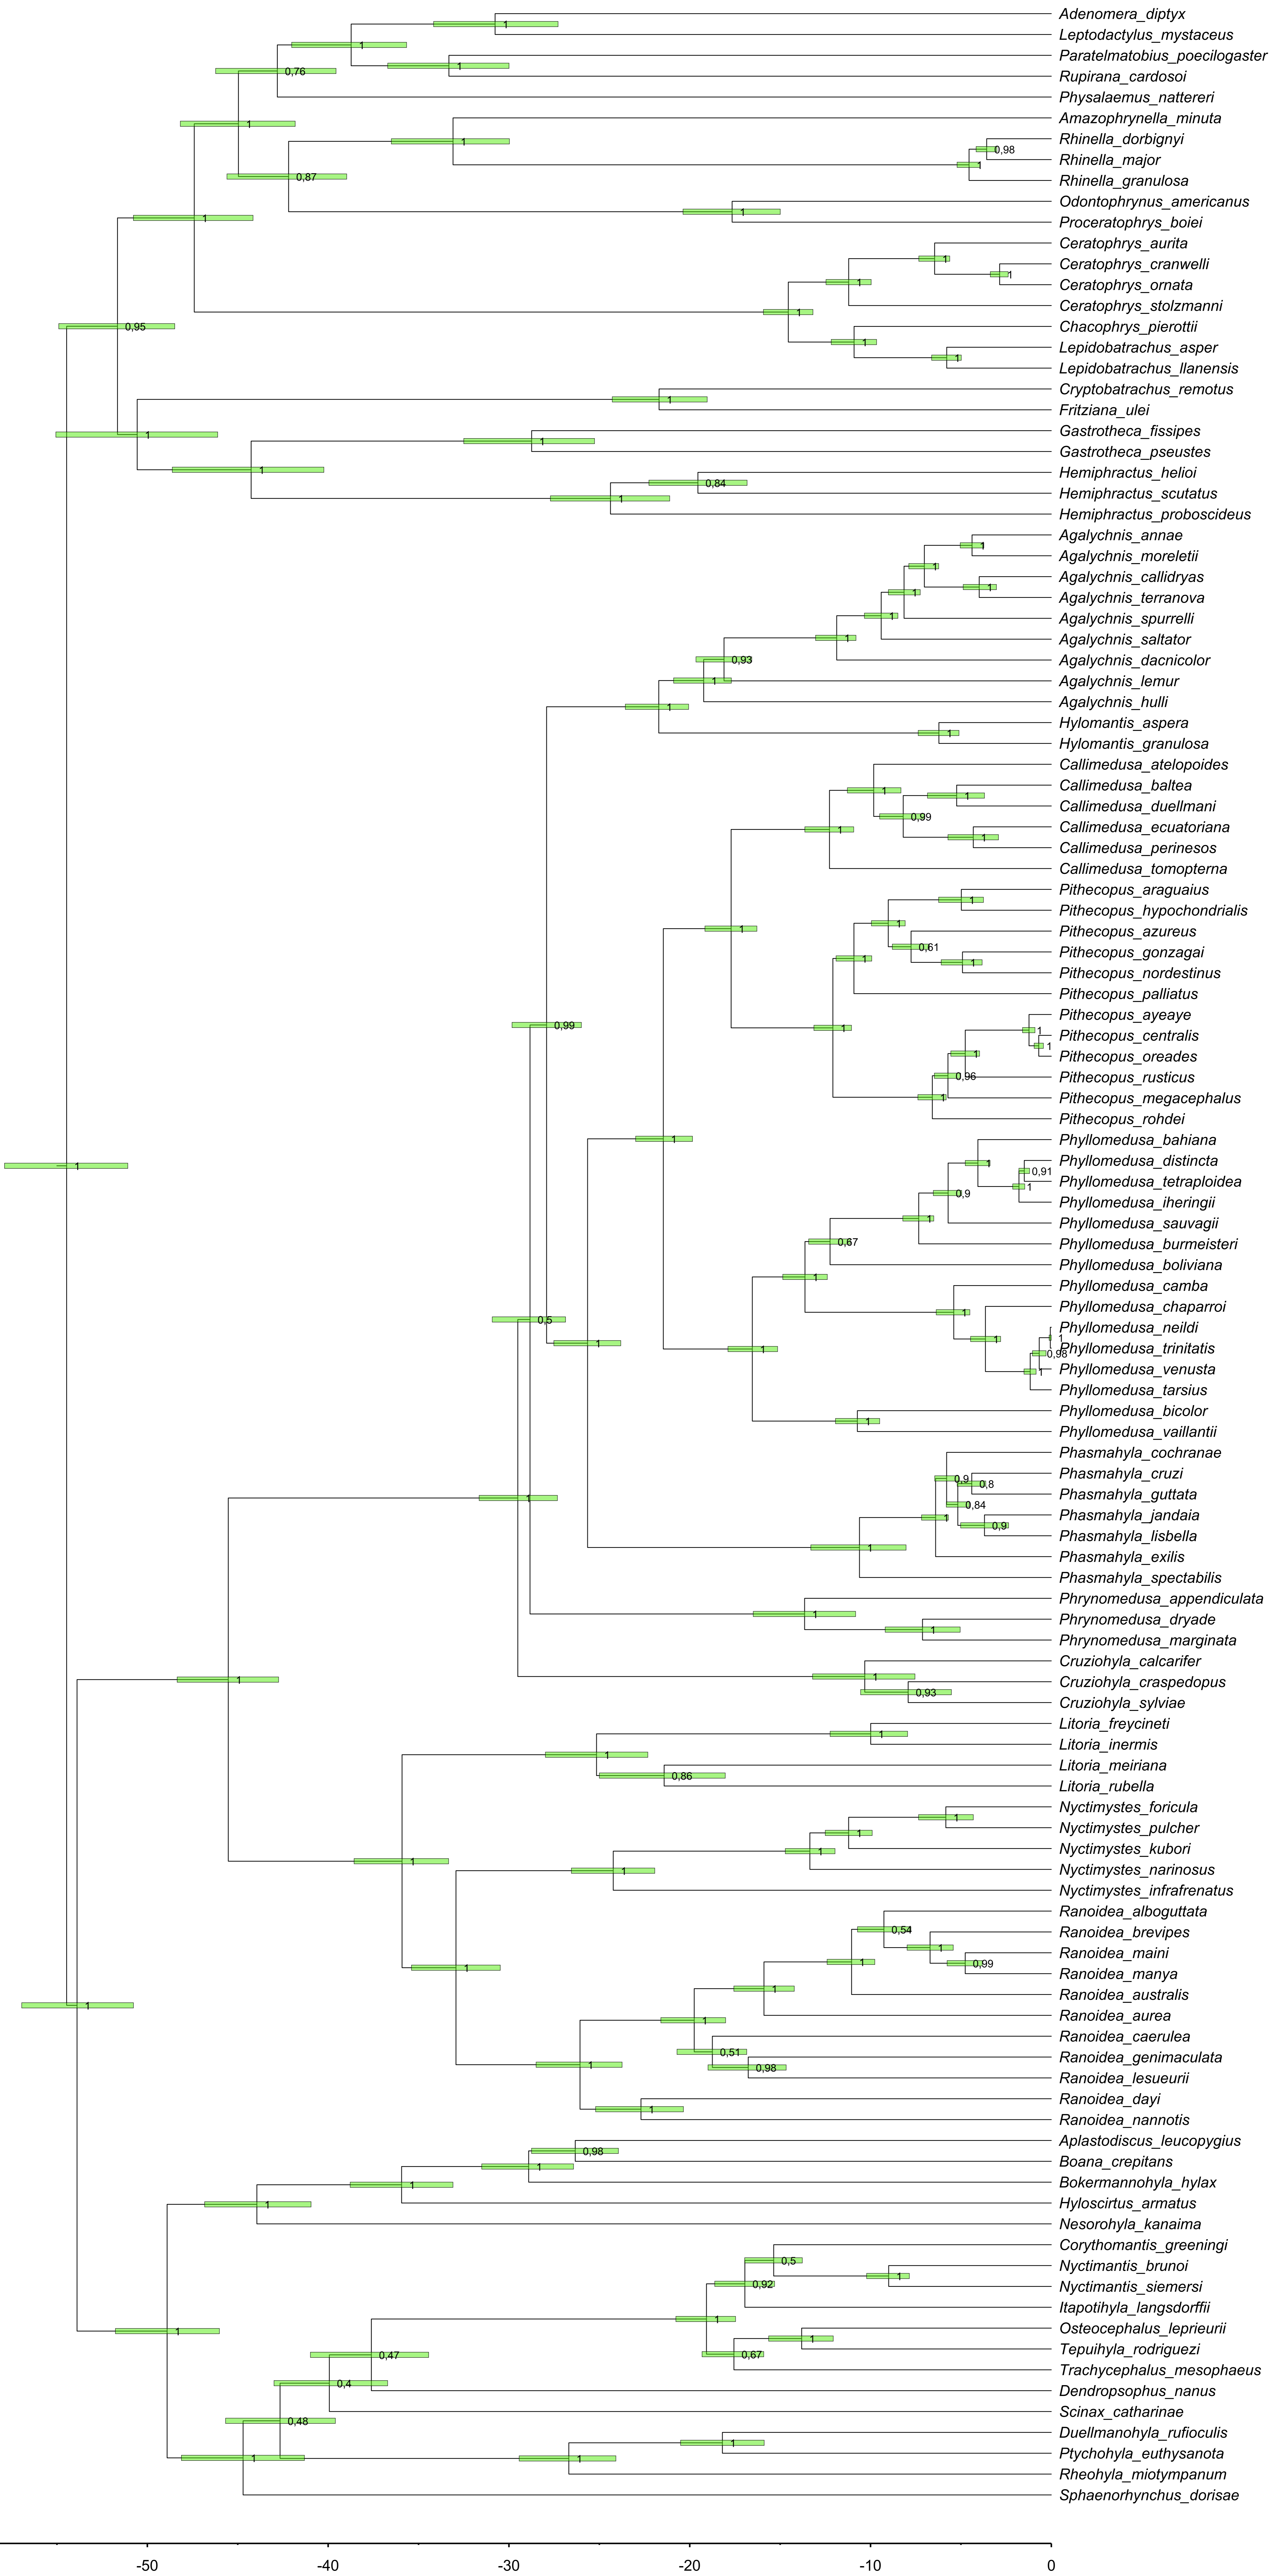

Supplement: AppendixS5.pdf [file AppendixS5.pdf]
