# Supplementary material for: Marine introgressions and Andean uplift have driven diversification in neotropical Monkey tree frogs (Anura, Phyllomedusinae)
Source: PeerJ. 2024 Apr 16;12:e17232. doi: 10.7717/peerj.17232 (PMC11027904; doi:10.7717/peerj.17232)
Supplement: Supplemental Information 1 — The first sheet tab “Genbank” shows the species used in the phylogenetic inference and the GenBank accession numbers related for all 13 genes utilized (12S, 16S, CXCR4, cytb, NCX1, ND1, ND2, POMC, RAG1, RHOD, SIA, SLC8A3, TYR). The second tab “Partitions&Models” summarizes the partition scheme and related substitution model utilized for the Bayesian phylogenetic inference. [file peerj-12-17232-s001.xlsx]

## Sheet: Metadata
Tab	Captions
Genbank	GenBank accession numbers for gene sequences (12S, tRNA-Val, 16S, CXCR4, cytb, tRNA-Leu, ND1, tRNA-Ile, POMC, RAG1, RHOD, SIA, TYR) of specimens used for molecular phylogenetic analyses. We present voucher and localities for each sequence. We colored cells to highlight sequences combining genes from two (yellow) or three (purple) distinct individuals for the same species.
Unused sequences	Phyllomedusinae sequences available in Genbank do not used in our analysis due to the absence of query coverage when using the BLASTn tool.
Partitions&Models	Selected models through bModelTest and the number of base pairs (bp) for each partition of the molecular data used.
GeogFile	Geography file (geogfn) used in BioGeoBEARS analysis, folowed by a detailed presence/absence matrix in regionalisation units by species. Following, we present references and remarks used to filter point data obtained in GBIF.

## Sheet: Genbank
Family	Scientific Name	Type locality	Voucher1	Site1	Voucher2	Site2	Voucher3	Site3	12S	tRNA-Val	16S	CXCR4	cytb	tRNA-Leu	ND1	tRNA-Ile	POMC	RAG1	RHOD	SIA	TYR
Bufonidae	Rhinella_granulosa	"Provincia Bahiae", Brazil	CFBH 7341	Brazil: Alagoas, Passo de Camarajibe	-	-	-	-	KP685205	KP685205	KP685205	KP684961	KP685000	KP685054	KP685054	KP685054	KP685095	-	KP685170	-	-
Bufonidae	Rhinella_dorbignyi	"Montévidéo", Uruguay; corrected to "Maldonado", Uruguay	MNHN 9492	Uruguay: Treinta y tres, Banado de los Oliveras	-	-	-	-	KP685199	KP685199	KP685199	KP684956	KP684994	KP685048	KP685048	-	KP685090	-	KP685168	-	-
Bufonidae	Rhinella_major	"San José de Chiquitos", Bolivia	LGE 8721	Argentina: Formosa, Pirane, Ruta Provincial 81; 1.5 km NW from its intersection with Ruta Provincial 3	-	-	-	-	KP685216	KP685216	KP685216	KP684970	KP685005	KP685063	KP685063	-	KP685102	-	-	-	-
Bufonidae	Amazophrynella_minuta	"Taracúa, Rio Uaupés, [State of Amazonas,] Brazil"	MJH 7095	Peru: Huanuco, Rio Llullapichis, Panguana	QCAZ 883	-	-	-	AY843582	AY843582	AY843582	DQ306496	AY843804	-	-	-	DQ158262	DQ503337	AY844555	-	-
Leptodactylidae	Leptodactylus_mystaceus	ad Bahiam [now Salvador, Bahia] in aqua fluviatili; differt ab illa prope flumen Solimoens", Brazil; restricted to Solimões [Brazil]	SMNS12036	Guyana: Mabura Hills Forest Reserve	-	-	-	-	KC603959	-	-	-	KC603979	AY911286	AY911286	-	KC604058	KC604036	KC604108	-	JN691817
Leptodactylidae	Paratelmatobius_poecilogaster	Paranapiacaba (aproximadamente 23° 47′ S, 46° 18′ W, 850 m de altitude)", municipality of Santo André, state of São Paulo, Brazil	CFBHT 1423	Sao Paulo, Sao Luiz do Paraitinga, Santa Virginia, Parque Estadual da Serra do Mar	-	-	-	-	MN917564	MN917564	MN917564	-	MN932625	MN382651	MN382651	MN382651	MN932802	MN932975	MN933133	-	MN933326
Leptodactylidae	Physalaemus_nattereri	Cuyaba in [Mato Grosso,] Brasilien	MRT9002	Brazil: Tocantins, Uhe Lajeado	ZUEC 17506	Brazil: Tres Lagoas, state of Mato Grosso do Sul	-	-	KP146103	KP146103	KP146103	-	KC603965	-	-	-	KC604053	-	-	-	KC604079
Leptodactylidae	Rupirana_cardosoi	Mucujê, Bahia, Brazil, 13° 00′ S, 41° 23′ W	FJ117/MZFS 2415	Brazil: Bahia, Mucuge, Parque Municipal de Mucuge	JC1112	Brazil: Bahia, Mucuge	-	-	KC593361	KC593361	KC593361	KC593348	KC593351	KC593354	KC593354	KC593354	KC604049	KC604034	KC604106	-	KC593368
Leptodactylidae	Adenomera_diptyx	"Paraguay, Amer. merid."	IIBPH905	Paraguay: Concepicion, Estancia Garay Cue, Cerrados Del Tagatiya	-	-	-	-	KC603938	KC603938	KC603938	-	KC603966	-	-	-	KC604062	KF674278	KC604098	-	KC604086
Odontophrynidae	Odontophrynus_americanus	"nous ne possédons qu'un seul individu, qui a été envoyé de Buenos-Ayres par M. d'Orbignyi"	AF665	Poços de Caldas, MG	MACN 43992	-	-	-	KF214099	-	FJ685686	-	FJ685666	JX204059	JX204059	JX204059	JX298141	FJ685706	KF214201	-	JX298239
Odontophrynidae	Proceratophrys_boiei	"Brasilien"; given as "Bahia" and "Rio de Janeiro", Brazil	AF1587	-	TNHC-GDC 31174	-	-	-	KF214104	-	FJ685693	KX200409	FJ685673	-	-	-	KC604071	FJ685713	KF214206	-	-
Hemiphractidae	Cryptobatrachus_remotus	"La Victoria, quebrada Tucuy, municipio La Jagua de Ibirico, Cesar, Colombia, 928 m"	MHNLS 18853	-	-	-	-	-	KR559914	-	KR270416	KR138404	-	KR138379	KR138379	-	KR270360	KR138394	-	-	KR270387
Hemiphractidae	Fritziana_ulei	"Nova Friburgo, E[stado]. do Rio [de Janeiro]", Brazil	MNRJ 44622	Brazil: Rio de Janeiro, Cachoeiras de Macacu	-	-	-	-	KX938421	KX938421	KX938421	KR138407	-	-	-	-	KR270362	KR138396	-	-	KR270390
Hemiphractidae	Gastrotheca_pseustes	"7.1 km (by road) north of San Lucas, 2940 m (03° 41′ S, 79° 15′ W), Provincia Loja, Ecuador"	TNHC:62492	Ecuador: Chimborazo; 3.3 km S Tixan; 2990 m	TNHC-GDC 2543	-	-	-	JX564866	JX564866	JX564866	KX200453	JX564866	JX564866	JX564866	JX564866	-	KX208740	-	-	-
Hemiphractidae	Gastrotheca_fissipes	"Iguarasse [= Igaraçu], Pernambuco", Brazil. Rendered as "Municipality of Igarassu, 07 50 S, 34 54 W, State of Pernambuco, Brazil"	JLG09	Brazil: Espirito Santo, Setiba, Guarapari	CFBH T377	Brazil: Espirito Santo, Setiba	-	-	AY843592	AY843592	AY843592	-	-	KC844953	KC844953	-	KC844976	AY844381	AY844564	AY844790	-
Hemiphractidae	Hemiphractus_helioi	"Peru: Cuzco: Rio Cosñipata, 4 km SW Santa Isabel, 1700 m . . . . 13° 05′ S, 71° 18′ W"	MHNCP 9063	-	MJH 3689	-	-	-	KR559922	-	KR270431	KR138412	AY843813	-	-	-	KR270368	-	AY844566	-	KR270394
Hemiphractidae	Hemiphractus_scutatus	"in sylvis fluvii Solimoëns" = Rio Solimões, Amazonas, Brazil	JMP 2150	-	RWM 10453	-	-	-	KR559923	-	KR270432	KR138413	-	DQ679371	DQ679371	-	KR270369	-	-	-	KR270395
Hemiphractidae	Hemiphractus_proboscideus	"Sumaco, Provincia Napo, Ecuador"	KU 217513	Ecuador: Pastaza, Locacion Petrolera Garza, 1, NE of Monfaluo, 300 m	-	-	-	-	AY819358	-	DQ679413	-	-	AY819489	AY819489	-	AY819107	DQ679304	-	-	-
Ceratophrydae	Ceratophrys_aurita	"Serra da Estrela, Inhomirin, Rio de Janeiro", Brazil	CFBH 33211	Brazil: Espirito Santo, Linhares	CFBH 2319	Brazil: Sao Paulo, Ribeirao Branco	-	-	KP295605	KP295605	KP295605	KP295517	KP295728	KP295540	KP295540	-	KP295565	KP295586	KP295705	KP295645	KP295665
Ceratophrydae	Ceratophrys_cranwelli	"Gramilla, Santiago del Estero", Argentina	LGE 9111	Argentina: Chaco, Almirante Brown, Picada Principal ETA, 13 km W R.P. 61	-	-	-	-	KP295609	KP295609	KP295609	KP295520	KP295731	KP295543	KP295543	KP295543	KP295568	KP295590	KP295709	KP295649	KP295669
Ceratophrydae	Ceratophrys_ornata	"Buenos Ayres", Argentina	LGE 9118	Argentina: Buenos Aires, La Plata, La Plata, Parque Sicardi	-	-	-	-	KP295619	KP295619	KP295619	KP295522	KP295735	KP295549	KP295549	KP295549	KP295571	KP295595	KP295714	KP295655	KP295675
Ceratophrydae	Ceratophrys_stolzmanni	"Tumbez" (= Tumbes, northwestern Peru)	MACN 47250	-	-	-	-	-	KP295620	KP295620	KP295620	KP295523	KP295736	KP295550	KP295550	KP295550	KP295572	KP295596	KP295715	-	KP295676
Ceratophrydae	Chacophrys_pierottii	"Hickman, Province de Salta, dans la région du Chaco", Argentina	MACN 47251	Argentina: Oran, Pichanal, R.P. 5 and Rio San Francisco	-	-	-	-	KP295621	KP295621	KP295621	KP295524	KP295737	KP295551	KP295551	KP295551	KP295573	KP295597	KP295716	KP295656	KP295677
Ceratophrydae	Lepidobatrachus_asper	"charcos al borde del camino, a 4 km al S de la localidad de Río Saladillo (Santiago del Estero)", Argentina	MACN 47253	Argentina: Santa Fe, 9 de Julio, R.N. 98, 5 Km E Tostado	-	-	-	-	KP295626	KP295626	KP295626	KP295527	KP295739	KP295553	KP295553	KP295553	KP295574	KP295598	KP295718	KP295658	KP295679
Ceratophrydae	Lepidobatrachus_llanensis	"Punta de los Llanos (La Rioja)"	MACN 43523	Argentina: Salta, Oran, Pichanal, R.P. 5 y Rio San Francisco	-	-	-	-	KP295636	KP295636	KP295636	KP295531	KP295745	KP295557	KP295557	KP295557	KP295577	KP295601	KP295723	KP295661	KP295683
Hylinae	Aplastodiscus_leucopygius	"Represa do Guinle, Teresópolis, Rio de Janeiro", Brazil	USNM 303038	Brazil: Sao Paulo, Estacao Biologica de Boraceia, near Salesopolis, Serra do Mar	CFBHT15400	Brazil: Sao Paulo, Nazare Paulista, Banhado antes da casa do Senhor Aparicio, perto da casa abandonada, mas do outro lado da estrada	-	-	AY843638	AY843638	AY843638	KF751466	AY843873	KF794106	KF794106	KF794106	KU494347	AY844425	AY844622	AY844840	AY844084
Hylinae	Boana_crepitans	"Tamburil, Jiboya, Arrayal da Conquista" Bahia Brazil; restricted to "Tamburil, [Municipality of] Condeúbas, Bahia, Brazil"	CFBH 2966	Brazil: Alagoas, Municipio de Piranhas, Represa de Xingo	-	-	-	-	AY843621	AY843621	AY843621	KF751482	AY843850	-	MT824108	-	-	AY844412	AY844601	-	AY844067
Hylinae	Bokermannohyla_hylax	"Brazil: São Paulo; Booracéia, approximately 23° 38′ S, 45° 50′ W"	USNM 303036	Brazil: Sao Paulo, Near Salesopolis, Estacao Biologica de Boraceia	-	-	-	-	AY549338	AY549338	AY549338	-	AY549391	-	-	-	-	AY844419	AY844614	AY844832	AY844077
Hylinae	Corythomantis_greeningi	"Brazil (exact locality unknown)"; corrected to "Brazil: Espirito Santo"	CFBH 2968	Brazil: Alagoas, Represa de Xingo, Piranhas	-	-	-	-	AY843578	AY843578	AY843578	-	AY843800	KF002247	KF002247	KF002247	MN954568	AY844374	AY844551	AY844779	AY844030
Hylinae	Dendropsophus_nanus	"Colonia Resistencia, South Chaco, Argentine Republic"	MACN 37785	Argentina: Entre Rios, Dto. Islas del Ibicuy	USNM Field Number 53122	Brazil: Sao Paulo; Fazenda Jatai, south of Luiz Antonio, Lagoa near Rio Mogi-Gaussu	-	-	AY549346	AY549346	AY549346	GQ365985	AY549399	GQ366298	GQ366298	GQ366298	AY819123	AY844437	AY844634	AY844852	-
Hylinae	Duellmanohyla_rufioculis	"Isla Bonita (American Cinchona Plantation), eastern slope of Volcán Poás, [Cantón de Alajuela, Provincia de Alajuela,] Costa Rica", 1200 m elevation	MVZ 207193; MVZFC 14248	Costa Rica: Guanacaste, Volcan Cacao	MVZ 207197	Costa Rica: Prov. Guanacaste, trail from Finca Harold to Casa Mengo, N branch Rio San Josecito, first stream below Casa Mengo, Volcan Cacao; elevation 1000 m (10.900000; -85.500000)	-	-	AY843583	AY843583	AY843583	-	AY843805	DQ388749	DQ388749	-	DQ388705	AY844377	AY844556	AY844782	AY844033
Hylinae	Hyloscirtus_armatus	"La Paz, Bolivia, 4000 m."	AMNH A-165163	Bolivia: Santa Cruz, Caballero, Canton San Juan, Amboro National Park	AMNH-A 1651632	Bolivia: Santa Cruz, Caballero, Canton San Juan, Amboro National Park	-	-	AY549321	AY549321	AY549321	-	AY843826	KF794111	KF794111	KF794111	-	AY844393	AY844579	AY844804	AY844050
Hylinae	Itapotihyla_langsdorffii	"Brésil"; "provàvelmente baixada fluminense"	MACN 38643	Argentina: Misiones, General Belgrano, 10 Km N Bernardo de Irigoyen, Salto Andresito	USNM 303287	Brazil: Sao Paulo, Estacao Ecologica de Jureia, N of Jureia	-	-	AY843706	AY843706	AY843706	-	AY843951	AY819511	AY819511	-	AY819129	AY844482	AY844697	AY844903	AY844137
Hylinae	Nesorohyla_kanaima	"Mt. Kanaima, the Potaro River, [Potaro District,] British Guiana [= Guyana]"	ROM 39582	Guyana: Mount Ayanganna	-	-	-	-	AY843634	AY843634	AY843634	GQ365994	AY843868	GQ366307	GQ366307	GQ366307	MH004186	AY844422	AY844617	AY844835	AY844079
Hylinae	Nyctimantis_brunoi	Not designated; given as "Rio de Janeiro", Rio de Janeiro, Brazil	CFBH 2715	Brazil: Espirito Santo, Aracruz	CFBH 2750	Brazil: Espirito Santo, Aracruz	-	-	AY843567	AY843567	AY843567	-	AY843789	KF002246	KF002246	KF002246	-	AY844364	AY844541	AY844769	AY844023
Hylinae	Nyctimantis_siemersi	"Buenos Aires, am Rio de la Plata", Provincia Buenos Aires, Argentina	MACN 38644	Argentina: Corrientes, Bella Vista, Interseccion R. N. 12 y Rio Santa Lucia	-	-	-	-	AY843570	AY843570	AY843570	-	AY843792	MN961719	MN961719	MN961719	-	AY844367	AY844544	AY844772	AY844026
Hylinae	Osteocephalus_leprieurii	"Cayenne", French Guiana	AMNH A-131254	Venezuela: Amazonas, Neblina Base Camp Rio Mawarinuma (= Rio Baria), 140 m	-	-	-	-	AY843707	AY843707	AY843707	-	AY843952	KF002223	KF002223	KF002223	MN954598	AY844483	AY844698	AY844904	AY844138
Hylinae	Ptychohyla_euthysanota	"Los Esesmiles, Departament of Chalatenango, El Salvador, C[entral]. A[merica]. Altitude 6400 feet"	UTA A-54786	Mexico: Chiapas, Cerro El Baul, Colonia Rodulfo Figueroa, 1307m	-	-	-	-	AY843744	AY843744	AY843744	-	AY843990	-	-	-	-	AY844509	AY844731	AY844933	AY844170
Hylinae	Rheohyla_miotympanum	"Near Jalapa" and "Mirador", Veracruz, Mexico. Restricted to "Jalapa", Veracruz, Mexico	JAC22438	Mexico: Puebla, Sierra Norte, Cuetzalan, Hotel Villas Cuetzalan, 1250 m.	-	-	-	-	AY843645	AY843645	AY843645	-	AY843884	-	-	-	-	AY844433	AY844630	AY844848	AY844090
Hylinae	Scinax_catharinae	"Serra do Catharina", Santa Catarina, Brazil	MCP3734	Brazil: Rio Grande do Sul, Pro-Mata	USNM 208986	Brazil: Sao Paulo, Estacao Biologica de Boraceia, near Salesopolis, Serra do Mar	-	-	AY843756	AY843756	AY843756	-	AY844001	-	AY819522	-	AY819140	AY844517	AY844742	AY844941	-
Hylinae	Sphaenorhynchus_dorisae	"near Leticia, Amazonas Comisaría, Colombia"	CFBH15721	Brazil: Acre, Rodrigues Alves	-	-	-	-	MK266742	MK266742	MK266742	-	MK266599	-	-	-	-	MK266628	MK266654	-	MK266683
Hylinae	Tepuihyla_rodriguezi	"Paso del Danto, Región de La Escalera, ca. 1400 m above San Isidor, road from El Dorado to Sta. Elena de Uairén, Estado Bolívar, Venezuela"	CPI 10223	Guyana: Mazaruni-Potaro, Wei Assipu summit	-	-	-	-	KF002183	KF002183	KF002183	-	KF002000	MN961753	MN961753	-	MN954637	MN953302	MN953114	-	MN953261
Hylinae	Trachycephalus_mesophaeus	"Provinz S. Pedro de Rio Grande do Sul", Brazil; given as "Porto Alegre, Rio Grande do Sul, Brasil	CFBH 5780	Brazil: Rio de Janeiro, Parati	-	-	-	-	AY843718	AY843718	AY843718	-	AY843963	MN961761	MN961761	MN961761	-	AY844491	AY844705	AY844910	AY844147
Pelodryadinae	Litoria_freycineti	"Nova Hollandia" (= Australia). Given as "Port-Jackson"	SAMA 12260	Australia: New South Wales, 16km E Retreat	-	-	-	-	AY843693	AY843693	AY843693	GQ365989	AY843939	-	-	-	-	AY844473	AY844686	AY844894	-
Pelodryadinae	Litoria_inermis	"Rockhampton, [Queensland,] N. O. Australien"	SAMA R53945	Australia: 24 km N Tunnel Creek Gorge	-	-	-	-	DQ283211	DQ283211	DQ283211	-	-	-	-	-	-	-	DQ283892	-	-
Pelodryadinae	Litoria_meiriana	"rock pool 98 miles north of Mainoru, Northern Territory", Australia	SAMA 17215	Australia: Western Australia, Black Rock, near Kununurra	-	-	-	-	AY843695	AY843695	AY843695	-	-	GQ366304	GQ366304	GQ366304	-	AY844475	AY844688	AY844895	AY844132
Pelodryadinae	Litoria_rubella	"North coast of Australia; Port Essington", Northern Territory, Australia	SAMA R42871	No information	DLS N-72395	Australia	-	-	DQ116832	-	DQ116856	-	-	AY819536	AY819536	-	-	-	-	-	-
Pelodryadinae	Nyctimystes_foricula	"between 5,000 feet and 6,000 feet in the Kaironk Valley, Schrader Mountains, Australian Trusteeships Territory of New Guinea" (Madang Province, Papua New Guinea)	ABTC45668	No information	No information	No information	-	-	FJ965941	-	FJ945443	-	-	-	-	-	AY819150	-	-	-	-
Pelodryadinae	Nyctimystes_infrafrenatus	"Cape York [Peninsula]", Queensland, Australia	No information	No information	-	-	-	-	AY843694	AY843694	AY843694	GQ365990	AY843940	GQ366302	GQ366302	GQ366302	-	AY844474	AY844687	-	-
Pelodryadinae	Nyctimystes_kubori	"Kubor Mountains near Kup at an elevation of between 5000 and 8000 feet, North-east New Guinea" (Chimbu Province, Papua New Guinea)	AMNH A-82822	Papua New Guinea: Moroba, Wau	TNHC:51924	Papua New Guinea: Madang; ~10 km NW Simbai; Kaironk Village; 2000 m	-	-	AY843702	AY843702	AY843702	GQ365991	AY843947	GQ366303	GQ366303	-	-	AY844479	AY844693	-	-
Pelodryadinae	Nyctimystes_narinosus	"Mt. Hagen in the Wahgi Valley region of North-east New Guinea at an elevation of over 8000 feet", Western Highlands Province, Papua New Guinea	AMNH A-82845	Papua New Guinea: Tambul	-	-	-	-	AY843703	AY843703	AY843703	GQ365992	AY843948	GQ366305	GQ366305	GQ366305	-	-	AY844694	-	AY844135
Pelodryadinae	Nyctimystes_pulcher	"Sacksackhütte", Torricelli Mountains, West Sepik Province, Papua New Guinea	SAMA 45336	Papua New Guinea: Magidobo, SHP	SAMA 45335	Papua New Guinea: Magidobo, SHP	-	-	AY843701	AY843701	AY843701	GQ365993	AY843946	GQ366306	GQ366306	GQ366306	-	-	AY844692	-	AY844134
Pelodryadinae	Ranoidea_alboguttata	"Port Denison [and], Cape York", Queensland, Australia	SAMA R34992	No information	No information	No information	-	-	DQ116846	-	DQ116870	-	-	-	EF080969	-	-	-	-	-	-
Pelodryadinae	Ranoidea_aurea	"la rivière Macquarie a Bathurst, au-delà des montagnes Bleues", New South Wales, Australia	AM 52744	New Caledonia: Province Nord, Valle Phaaye, Nomac River, 8 km E. Poum	TWR 1006	No information	-	-	AY843691	AY843691	AY843691	-	AY843937	AY819530	AY819530	-	GQ366037	-	AY844684	AY844892	AY844130
Pelodryadinae	Ranoidea_australis	"North coast of Australia"; restricted to "Port Essington, Northern Territory", Australia	SAM16906	Australia: No data	-	-	-	-	AY843580	AY843580	AY843580	GQ365987	AY843802	GQ366300	GQ366300	GQ366300	-	AY844376	AY844553	-	-
Pelodryadinae	Ranoidea_brevipes	"Port Bowen" (=Port Clinton), Queensland, Australia	DLS-N72023	Australia	ABTC7078	No information	-	-	AY819411	AY819411	FJ945355	-	-	-	-	-	-	-	-	-	-
Pelodryadinae	Ranoidea_caerulea	"New South Wales", Australia	AMNH A-168409	No information	TWR 1007	No information	-	-	AY843692	AY843692	AY843692	GQ365988	AY843938	GQ366301	GQ366301	GQ366301	AY819149	-	AY844685	AY844893	AY844131
Pelodryadinae	Ranoidea_dayi	"Bartle Frere Mountains", northeastern Queensland, Australia	SAMA R41010	Australia: Pilgrim Sands	-	-	-	-	DQ283220	DQ283220	DQ283220	-	-	-	-	-	-	-	DQ283897	DQ282757	-
Pelodryadinae	Ranoidea_genimaculata	"Gebeh (= Gagie?) [I.]", west of Waigeo I., Indonesia	SAMA R41068	Australia: Mt. Lewis	-	-	-	-	DQ283222	DQ283222	DQ283222	-	-	-	-	-	-	-	DQ283899	DQ282759	-
Pelodryadinae	Ranoidea_lesueurii	"port Jackson" (= Sydney), New South Wales, Australia	SAMA R35012	Australia: Murrumbidgee R.	-	-	-	-	DQ283204	DQ283204	DQ283204	-	-	-	-	-	-	-	DQ283887	DQ282747	-
Pelodryadinae	Ranoidea_maini	"Barrow Creek, Northern Territory", Australia	1140CycMai	No information	CEBB 35088	No information	SAMAR36207	No information	FJ882737	FJ882737	FJ945360	EF107475	-	FJ882738	FJ882738	FJ882738	-	-	-	-	-
Pelodryadinae	Ranoidea_manya	"between Coen airport and Deep Creek crossing, 25 km N. of Coen township (13° 52′ S, 143° 12′ E), Cape York Peninsula, Queensland", Australia	DLS N-72386	Australia	ABTC64861	No information	-	-	AY819397	AY819397	FJ945361	-	-	AY819529	AY819529	-	AY819147	-	-	-	-
Pelodryadinae	Ranoidea_nannotis	"Tully River, N. Queensland", Australia	SAMAR40266	Australia: Paluma	-	-	-	-	DQ283218	DQ283218	DQ283218	-	-	-	-	-	-	-	DQ283896	DQ282756	-
Phyllomedusinae	Agalychnis_annae	"Tapantí, [Cantón de Paraíso,] Cartago Province, Costa Rica, 1200 meters"	captive specimen, Atlanta Botanical Garden	No information	IGM 10 (Ivan Gomez-Mestre field series)	Costa Rica: San Jose, Parque Zoologico Simon Bolivar, 1150 m	-	-	GQ366221	GQ366221	GQ366221	GQ365977	GQ365913	GQ366291	GQ366291	GQ366291	EF158394	-	-	GQ366159	GQ366198
Phyllomedusinae	Agalychnis_callidryas	"Darien", Panama; corrected to Córdoba, Veracruz	RdS 537	Belize: Stann Creek District, Cokscomb Basin Wildlife Santuary	I. Gomez-Mestre 11	Costa Rica: Limon, Alto Colorado, 3.5 km NE Guayacon, 710m	No. Hy01	No information	DQ283423	DQ283423	DQ283423	AB612054	-	EF396331	EF396331	-	EF158395	-	AY844537	DQ282880	DQ283018
Phyllomedusinae	Agalychnis_dacnicolor	"Near Colima", Mexico	JAC 22009	Mexico: Guerrero, Carretera Tierra Colorada-Ayutla, 187 m.	MVZ 164906	Mexico: Michoacan; Caprio; Rio Tepalcatepec	-	-	AY843714	AY843714	AY843714	GQ365995	AY843959	GQ366308	GQ366308	GQ366308	AY819152	AY844488	AY844702	AY844908	AY844144
Phyllomedusinae	Agalychnis_hulli	"forest pond at 1. 5 km N Teniente López, Provincia Loreto, Departamento Loreto, Peru (02° 35′ 38.9″ S, 76° 07′ 02.0″ W, 310 m)"	specimen to be deposited in SMNS	Ecuador: Prov. Napo, Selva Viva ca. 18 km ENE Ahuano	-	-	-	-	GQ366226	GQ366226	GQ366226	GQ365980	-	GQ366293	GQ366293	GQ366293	GQ366033	GQ366073	GQ366101	GQ366160	-
Phyllomedusinae	Agalychnis_lemur	"Costa Rica"	KRL 955	Panama: Cocle, El Cope, Parque Nacional 'Omar Torrijos	-	-	-	-	AY843725	AY843725	AY843725	GQ365981	AY843970	GQ366294	GQ366294	GQ366294	GQ366034	GQ366074	AY844712	AY844917	AY844154
Phyllomedusinae	Agalychnis_moreletii	"Vera-Paz", Guatemala; corrected to "Cobán in [Departamento Alta] Vera Paz, Guatemala"	captive specimen, Atlanta Botanical Garden	No information	I. Gomez-Mestre 14	Guatemala: Santa Rosa, Pueblo Nuevo Vioas, Finca Paraoso, 850m	-	-	GQ366227	GQ366227	GQ366227	GQ365982	GQ365916	GQ366295	GQ366295	GQ366295	EF158397	-	GQ366102	GQ366161	-
Phyllomedusinae	Agalychnis_saltator	"4 km NNE of Tilarán [= Finca San Bosco, Cantón de Tilarán], [Provincia] Guanacaste, Costa Rica"	JMR 609	Costa Rica: Prov. Heredia, La Selva Biological Station	I. Gomez-Mestre 12	Costa Rica: Limon, Alto Colorado, 3.5 km NE Guayacon, 710m	-	-	GQ366228	GQ366228	GQ366228	GQ365983	GQ365917	GQ366296	GQ366296	GQ366296	EF158398	-	-	-	-
Phyllomedusinae	Agalychnis_spurrelli	"Peña Lisa, Condoto, altitude 300 feet", Provincia Chocó, Colombia	KU 217507	Ecuador: Pichincha, Vicente Maldonadao, 670 m	QCAZ 13217	Ecuador	-	-	AY326043	AY326043	AY326043	-	-	AY819532	AY819532	-	AY819151	-	-	-	-
Phyllomedusinae	Agalychnis_terranova	"Colombia, Departamento de Antioquia, Municipio de Sonsón, Corregimiento La Danta, Vereda La Danta, 05° 50’ 8.04’’ N, 74° 50’ 16.55’’ W, 380 m.a.s.l."	MHUA_A_7316	No information	-	-	-	-	-	-	KC589394	-	-	-	-	-	-	-	-	-	-
Phyllomedusinae	Callimedusa_atelopoides	"Reserva Cuzco Amazónico, on the Río Madre de Dios, about 15 km E of Puerto Maldonado, 200 m (12° 33′ S, 69° 03′ W), Departamento de Madre de Dios, Peru"	KU 215381	Peru: Madre de Dios, Cuzco Amazonica, 15 km E Puerto Maldonado, 200 m	-	-	-	-	AY819413	AY819413	-	-	-	-	-	-	-	-	-	-	-
Phyllomedusinae	Callimedusa_baltea	"Laguna, on the west slope of Serranía de Sira, 1280 m, Departamento Huánuco, Perú"	To be deposited in SMNS	Peru: Depto. Pasco, Santa Cruz, near Oxapampa, 2050 m asl	-	-	-	-	GQ366252	GQ366252	GQ366252	GQ366008	GQ365941	GQ366321	GQ366321	GQ366321	-	GQ366085	GQ366127	-	-
Phyllomedusinae	Callimedusa_duellmani	"8 km NNE (by road) Balzapata, Depto. Amazonas, Perú, 1,850 m, 05° 47′ S, 77° 48′ W"	KU 212206	Peru: San Martin, Rioja, Venceremos, 89 m NW Rioja, 1630 m	-	-	-	-	AY819414	-	-	-	-	-	-	-	-	-	-	-	-
Phyllomedusinae	Callimedusa_ecuatoriana	"Agua Rica, a one-house posada on the trail between Limón and Gualeceo, slightly south and west of Limón, Provincia de Morona-Santiago, Ecuador, 1,890 m, 03° 02′ S, 78° 27′ W"	QCAZ47115	Ecuador: Provincia de Zamora Chinchipe, Los Encuentros	-	-	-	-	KF756940	-	-	-	-	KF756942	KF756942	KF756942	-	-	-	-	-
Phyllomedusinae	Callimedusa_perinesos	"Río Salado, about 1 km upstream from the Río Coca, Provincia Napo, Ecuador, 1410 m"	KU 178854	No information	-	-	-	-	GQ896278	-	-	-	-	-	-	-	-	-	-	-	-
Phyllomedusinae	Callimedusa_tomopterna	"Río Napo, or Upper Amazon, below the mouth of the former", Departamento Loreto, Peru	CFBH 2451	Brazil: Amazonas, Manaus	-	-	-	-	GQ366286	GQ366286	GQ366286	GQ366024	GQ365974	GQ366336	GQ366336	GQ366336	GQ366068	-	GQ366157	GQ366196	GQ366219
Phyllomedusinae	Cruziohyla_calcarifer	"the Rio Durango, 350 feet", Provincia Esmeraldas, Ecuador	I. Gomez-Mestre 15	Costa Rica: Limon, Alto Colorado, 3.5 km NE Guayacon, 710m	KRL 800	Panama: Cocle, El Cope, Parque Nacional 'Omar Torrijos`	-	-	AY843562	AY843562	AY843562	GQ365984	-	EF396335	EF396335	-	EF158399	-	AY844536	-	DQ282950
Phyllomedusinae	Cruziohyla_craspedopus	"Chicherota, Río Bobonaza, Napo-Pastaza [now Pastaza] Province, eastern Ecuador (Lat. 2° 22′ S., Long. 76° 38′ W.), at an altitude of about 250 meters"	MM 1016	Peru	-	-	-	-	-	-	MH377072	-	-	-	-	-	-	-	-	-	-
Phyllomedusinae	Cruziohyla_sylviae	"Alto Colorado: Guayacán: District of Siquirres: Limón Province: Costa Rica, 700 m a.s.l.	MM 1295	Limon, Guaycan, Alto Colorado	-	-	-	-	-	-	MH377071	-	-	-	-	-	-	-	-	-	-
Phyllomedusinae	Hylomantis_aspera	Bahia, Brazil; by implication; "provàvelmente Caravelas", Bahia, Brazil	MNRJ35370	Brazil: Bahia, Itacarai, Parque Estadual Serra do Conduru, Setor Norte	-	-	-	-	GQ366222	GQ366222	GQ366222	GQ365978	-	-	-	-	-	-	GQ366098	-	-
Phyllomedusinae	Hylomantis_granulosa	"Horto Zoobotanico Dois Irmãos, Recife, Estado de Pernambuco", Brazil	ZUFRJ7926	Brazil: Pernambuco, Jaqueira	-	-	-	-	AY843687	AY843687	AY843687	GQ365979	AY843933	GQ366292	GQ366292	GQ366292	GQ366032	AY844469	AY844680	AY844889	AY844127
Phyllomedusinae	Phasmahyla_cochranae	"Campo de Fruticultura da Bocaina, Serra da Bocaina, São Jose do Barreiro, state of São Paulo, Brazil, collected at 1,600 m.	CFBH 7307	Brazil: Pocos de Caldas, Minas Gerais	-	-	-	-	AY843715	AY843715	AY843715	GQ365996	AY843960	GQ366309	GQ366309	GQ366309	GQ366038	GQ366076	GQ366105	GQ366164	-
Phyllomedusinae	Phasmahyla_cruzi	"Rio das Pedras Reserve, Municipality of Mangaratiba (09°19′08″S, 36°28′16″W), approximately 200 m above sea level, on the bank of the Rio Grande River, state of Rio de Janeiro, Brazil	CFBH 5756	Brazil: Sao Paulo, Ubatuba (Picinguaba)	-	-	-	-	AY843716	AY843716	AY843716	GQ365998	AY843961	GQ366311	GQ366311	GQ366311	GQ366041	AY844489	AY844703	AY844909	AY844145
Phyllomedusinae	Phasmahyla_lisbella	"Fazenda Ventania (21°20′7.62″S, 42°12′15.40″W, 536 m above sea level), located in the Área de Protecão Ambiental Ventania, Miracema municipality, Rio de Janeiro state, Brazil	ZUFMS-AMP08808	No information	-	-	-	-	-	-	MG954000	-	-	-	-	-	-	-	-	-	-
Phyllomedusinae	Phasmahyla_spectabilis	"Fazenda Duas Barras (16°23′ S, 40°03′W, elevation 800 m), Municipality of Santa Maria do Salto, State of Minas Gerais, Brazil	BA779	Brazil: Bahia, Camacan	BA778	Brazil: Bahia, Camacan	-	-	-	-	KM387517	-	-	-	-	-	-	-	-	-	KM387557
Phyllomedusinae	Phasmahyla_exilis	"Santa Tereza, Espírito Santo, Brasil	CFBHt 1448	Brazil: Espirito Santo, Cariacica	-	-	-	-	GQ366231	GQ366231	GQ366231	GQ365997	GQ365920	GQ366310	GQ366310	GQ366310	GQ366039	GQ366077	GQ366106	GQ366165	-
Phyllomedusinae	Phasmahyla_guttata	"dans les montagnes, près de Rio [de Janeiro]"; restricted to "the Carioca mountain at Tijuca, Rio de Janeiro", Brazil	MNRJ 41688	Brazil: Rio de Janeiro, Rio de Janeiro, Horto Botanico	-	-	-	-	GQ366232	GQ366232	GQ366232	-	GQ365921	-	-	-	GQ366040	-	GQ366107	-	-
Phyllomedusinae	Phasmahyla_jandaia	"Km 126 da estrada de Vespasiano a Conceição do Mato Dentro, 1500 m, Jaboticatubas, Minas Gerais, Brasil	MNRJ 39980	Brazil: Minas Gerais, Santana do Riacho, Serra do Cipo, Alto Palacio	-	-	-	-	GQ366233	GQ366233	GQ366233	GQ365999	GQ365922	GQ366312	GQ366312	GQ366312	GQ366042	-	GQ366108	GQ366166	-
Phyllomedusinae	Phrynomedusa_marginata	"Santa Tereza, Estado do Espírito Santo, Brasil	USNM 217827	Brazil: Espirito Santo, near Santa Teresa, edge of Reserva Biologica Nova Lombardia (Reserva Biológica Augusto Ruschi)	-	-	-	-	AY819417	AY819417	-	-	-	-	-	-	-	-	-	-	-
Phyllomedusinae	Phrynomedusa_appendiculata	Not stated; given as São Bento do Sul, Santa Catarina, Brazil	MZUSP159234	Brazil: Sao Paulo, Capao Bonito, PENAP	-	-	-	-	OK352270	-	OK350365	-	-	-	-	-	-	OK357603	OK357602	-	-
Phyllomedusinae	Phrynomedusa_dryade	"Núcleo Santa Virgínia, Parque Estadual da Serra do Mar, município de São Luiz do Paraitinga, state of São Paulo, Brazil (23° 19′ 55.92″ S, 45° 5′ 48.58″ W, 979 m a.s.l., datum = WGS84)	CFBH38749	Brazil: Sao Paulo, Sao Luiz do Paraitinga, PESM Nucleo Santa Viginia	-	-	-	-	MT992168	MT992168	MT992168	-	-	-	-	-	-	MT996143	-	-	-
Phyllomedusinae	Phyllomedusa_bahiana	"Bahia", Brazil; given as "Salvador, Bahia", Brazil	MHNJCH 1462	Municipality of Jequié (Bahia, Brazil, −13.987925S −40.007450W)	CFBH 2596	Brazil: Sergipe, Areia Branca, Serra de Itabahiana	-	-	OM460708	OM460708	OM460708	-	OM460708	OM460708	OM460708	OM460708	GQ366050	-	GQ366126	GQ366177	GQ366205
Phyllomedusinae	Phyllomedusa_bicolor	"Guinea" or "Surinamo"; restricted to "Surinam"	AMNH A-168459	No information	-	-	-	-	AY843723	AY843723	AY843723	GQ366009	AY843968	GQ366322	GQ366322	GQ366322	-	AY844495	AY844710	AY844915	AY844152
Phyllomedusinae	Phyllomedusa_boliviana	"Chulumani, Bolivia, 2000 metres"	CFBH 2571	Brazil: Mato Grosso, Corumba	-	-	-	-	GQ366253	GQ366253	GQ366253	GQ366010	GQ365942	GQ366323	GQ366323	GQ366323	GQ366051	GQ366086	GQ366128	GQ366178	GQ366206
Phyllomedusinae	Phyllomedusa_burmeisteri	"Rio Janeiro", "Brazil", and "Oran Salta, Buenos Ayres"; restricted to "the city of Rio de Janeiro, specifically the Tijuca", Brazil	CFBHt 152	Brazil: Espirito Santo, Linhares	CFBH/T179	-	-	-	GQ366255	GQ366255	GQ366255	GQ366011	GQ365944	GQ366324	GQ366324	GQ366324	GQ366052	GQ366087	GQ366130	GQ366207	GQ366207
Phyllomedusinae	Phyllomedusa_camba	"Puerto Almacén, Provincia Ñuflo de Chávez, Departamento de Santa Cruz, Bolivia (15° 46′ S/62° 15′ W)	CFBH 17278	Brazil: Rondonia, Ministro Andreazza	UFMT 1909	Brazil: Mato Grosso, Vale de Sao Domingos	-	-	GQ366259	GQ366259	GQ366259	-	-	-	-	-	GQ366054	GQ366088	GQ366134	-	-
Phyllomedusinae	Phyllomedusa_chaparroi	"Shucshuyacu, 06°37'20.7'' S, 76°36'53.9'' W, 537 m above sea level, Departamento San Martín, Peru	MNCN46651	Peru: San Martin, Carretera Tarapoto-Tocachi, entre Quebrada 11 y 9, quebradas desde antes de Nuevo Jaen hasta un poco despues de 33, 650 masl	-	-	-	-	KY576706	KY576706	-	-	-	-	-	-	KY780163	-	-	-	-
Phyllomedusinae	Phyllomedusa_distincta	"Rio Vermelho", Santa Catarina, Brazil	CFBH 2114	Brazil: Sao Paulo, Ribairao Branco	CFBH 2658	Brazil: Parana, Guaratiba	CFBH12358	Brazil: Sao Paulo, Eldorado	GQ366263	GQ366263	GQ366263	GQ366013	GQ365951	GQ366326	GQ366326	GQ366326	GQ366056	MT996144	GQ366135	GQ366183	GQ366210
Phyllomedusinae	Phyllomedusa_iheringii	"S. Lorenzo, on the southern border of the Lagoa dos Patos. . . . Rio Grande do Sul", Brazil; rendered as "São L[o]urenço do Sul, Rio Grande do Sul", Brazil	MNRJ 18782	Brazil: Rio Grande do Sul, Santa Maria	CFBH/T 182	No information	-	-	GQ366264	GQ366264	GQ366264	KM365808	GQ365952	GQ366328	GQ366328	GQ366328	GQ366057	-	GQ366136	GQ366185	-
Phyllomedusinae	Phyllomedusa_neildi	"vicinity of Murucusa, Municipio Petit (11° 02′ N, 69° 35′ W), 550 masl, spurs of Sierra de San Luís, Estado Falcón, Venezuela	CVULA 6503	Venezuela: Falcon, Municipio Petit, Vicinity of Murucusa	-	-	-	-	GQ366270	GQ366270	GQ366270	GQ366015	GQ365958	GQ366329	GQ366329	GQ366329	-	-	GQ366142	GQ366190	GQ366214
Phyllomedusinae	Phyllomedusa_sauvagii	"Buenos Ayres. . . . Oran Salta", Argentina	MACN 40002	Argentina: Salta, Oran, Pichanal, Ruta Prov. 5 y Rio San Francisco	-	-	-	-	GQ366282	GQ366282	GQ366282	GQ366019	GQ365970	GQ366333	GQ366333	GQ366333	GQ366065	GQ366094	GQ366153	GQ366193	GQ366217
Phyllomedusinae	Phyllomedusa_tarsius	"Río Napo, or Upper Amazon, below the mouth of the former", Departamento Loreto, Peru	MJH 67	Brazil: Reserva Duke	-	-	-	-	AY843726	AY843726	AY843726	GQ366020	AY843971	-	-	-	-	GQ366095	AY844713	AY844918	AY844155
Phyllomedusinae	Phyllomedusa_tetraploidea	"Holambra II, município de Paranapanema (approx. 23° 23′ S, 48° 44′ W), Estado de São Paulo", Brazil	CFBH 2464	Brazil: Sao Paulo, Ribairao Branco	MACN 37796	Argentina: Misiones, Guarani, San Vicente, Campo Anexo INTA 'Cuartel Rio Victoria'	-	-	GQ366284	GQ366284	GQ366284	GQ366021	GQ365972	GQ366334	GQ366334	GQ366334	GQ366066	GQ366096	GQ366156	GQ366194	GQ366218
Phyllomedusinae	Phyllomedusa_trinitatis	"Port of Spain", Trinidad	CVULA 7086	Venezuela: Miranda, El Hatillo	-	-	-	-	GQ366287	GQ366287	GQ366287	GQ366026	GQ365975	-	-	-	-	GQ366097	GQ366158	GQ366197	GQ366220
Phyllomedusinae	Phyllomedusa_vaillantii	"Santarem, [Pará,] Brazil	AMNH-A 166288 ou AMNH-A 1662888 (erro de digitação)	Guyana: Berebice River camp at ca. 18 mi (linear) SW Kwakwani (ca. 2 mi downriver from Kurundi River confluence), 200 ft	-	-	-	-	AY549363	AY549363	AY549363	GQ366027	AY843974	GQ366338	GQ366338	GQ366338	-	AY844498	AY844716	AY844921	AY844158
Phyllomedusinae	Phyllomedusa_venusta	"1 km west-southwest of the junction of the Río Mono and the Río Tuira, Darién Province, Panamá, elevation 130 m	JSM 176	Colombia: Bolivar, Zambrano	-	-	-	-	-	-	MG030711	-	-	-	-	-	-	-	-	-	-
Phyllomedusinae	Pithecopus_araguaius	"Municipality of Pontal do Araguaia (15°54′51.4″S, 52°16′1.53″W, 418 m above sea level), Mato Grosso state", Brazil	ZUEC21659	Brazil: Mato Grosso, Pontal do Araguaia	-	-	-	-	-	-	MF926298	-	-	-	-	-	-	-	-	-	-
Phyllomedusinae	Pithecopus_ayeaye	"Morro do Ferro, a hill inside an ancient volcanic crater, at Poços de Caldas, Minas Gerais", Brazil	CFBHt 153	Brazil: Minas Gerais, Serra da Canastra	-	-	-	-	GQ366242	GQ366242	GQ366242	GQ366003	GQ365931	GQ366317	GQ366317	GQ366317	MF158470	GQ366083	GQ366117	GQ366172	GQ366201
Phyllomedusinae	Pithecopus_azureus	Not mentioned specifically, but the Page Expedition visited many localities that are now in Brazil, northeastern Argentina, and southern Paraguay, along the drainages of the Paraná and Paraguai Rivers	MLP DB 3449	Argentina: Santa Fe, Ver	CFBH 2576	Brazil: Mato Grosso, Corumba	-	-	GQ366249	GQ366249	GQ366249	GQ366007	GQ365938	GQ366320	GQ366320	GQ366320	-	GQ366084	GQ366124	GQ366176	GQ366204
Phyllomedusinae	Pithecopus_centralis	"Chapada dos Guimarães, Mato Grosso, Brasil	UFMT 6221	Brazil: Mato Grosso, Chapada dos Guimaraes	-	-	-	-	GQ366288	-	GQ366289	-	GQ365947	-	-	-	-	-	-	GQ366182	-
Phyllomedusinae	Pithecopus_gonzagai	"north-eastern Brazil, state of Pernambuco, municipality of Limoeiro; 7°52′ 29.0″ S, 35°27′ 01.1″ W; 150 m a.s.l.	ZUEC19680	Brazil: Limoeiro; Pernambuco	-	-	-	-	-	-	MW158585	-	-	-	-	-	-	-	-	MW186486	-
Phyllomedusinae	Pithecopus_hypochondrialis	"Surinam	AMNH A 141109	Guyana: Dubulay Ranch on the Berbice River	-	-	-	-	AY843724	AY843724	AY843724	GQ366014	AY843969	GQ366327	GQ366327	GQ366327	-	AY844496	AY844711	AY844916	AY844153
Phyllomedusinae	Pithecopus_megacephalus	"Brasil—Rio de Janeiro?	MCNAM 6338	Brazil: Minas Gerais, Santana do Riacho, Faz Calcada/Pico do breu	MCNAM 6339	Brazil: Minas Gerais, PARNA Serra do Cipo, Cardeal Mota	-	-	GQ366268	GQ366268	GQ366268	-	GQ365956	-	-	-	GQ366058	GQ366089	GQ366140	GQ366189	GQ366213
Phyllomedusinae	Pithecopus_nordestinus	"BRASIL: BAHIA: Município de Maracas (13° 26′ S, 40° 26′ W, 960 m de altitude)	CFBH 19538	Brazil: Bahia, Maracas, Fazenda Cana Brava	-	-	-	-	GQ366273	GQ366273	GQ366273	-	GQ365961	-	-	-	GQ366059	-	GQ366145	-	-
Phyllomedusinae	Pithecopus_oreades	"Serra da Mesa, Goiás State, Brazil (13° 45′ S; 48° 18′ W, 940 m), near 1 km after the first gate of the Serra da Mesa hydroelectric plant, on the road that connects the plant to Minaçu before the Avá-Canoeiros Indian reserve	CHUNB 56869	Brazil: Goias, PE Serra de Caldas	-	-	-	-	GQ366274	GQ366274	GQ366274	-	GQ365962	-	-	-	GQ366060	-	GQ366146	-	-
Phyllomedusinae	Pithecopus_palliatus	"Ucayali", Peru	specimen to be deposited in SMNS	Bolivia: Beni, Rurrenabaque	-	-	-	-	GQ366280	GQ366280	GQ366280	GQ366017	GQ365968	GQ366331	GQ366331	GQ366331	-	GQ366092	-	GQ366191	-
Phyllomedusinae	Pithecopus_rohdei	"Rio de Janeiro, Brasilien	CFBHt 181	Brazil: Sao Paulo, Ubatuba, Itagua	-	-	-	-	GQ366236	GQ366236	GQ366236	GQ366000	GQ365925	GQ366315	GQ366315	GQ366315	GQ366044	GQ366079	GQ366111	GQ366169	GQ366200
Phyllomedusinae	Pithecopus_rusticus	"Água Doce municipality (26°35′59.9″ S, 51°34′39.4″ W; 1330 m above sea level), Santa Catarina state, Brazi	UFMG 13355	Brazil: Agua Doce, Santa Catarina	-	-	-	-	KM206705	KM206705	KM206705	-	-	-	-	-	-	-	-	-	-
									112	97	113	62	80	74	77	56	67	68	86	62	63

## Sheet: Unused sequences
Family	Scientific Name	Gene	Accession
Pelodryadidae	Ranoidea_aurea	RAG1	EF174309
Pelodryadidae	Ranoidea_caerulea	RAG1	EF174310
Pelodryadidae	Ranoidea_manya	RAG1	EF174308
Phyllomedusidae	Agalychnis_annae	RAG1	EF174311
Phyllomedusidae	Agalychnis_callidryas	RAG1	EF174312
Phyllomedusidae	Agalychnis_moreletii	RAG1	EF174314
Phyllomedusidae	Agalychnis_saltator	RAG1	EF174315
Phyllomedusidae	Agalychnis_spurrelli	RAG1	EF174316
Phyllomedusidae	Callimedusa_tomopterna	RAG1	EF174319
Phyllomedusidae	Cruziohyla_calcarifer	RAG1	EF174317
Pelodryadidae	Ranoidea_manya	CytB	EF125030
Phyllomedusidae	Agalychnis_callidryas	CytB	EF125028
Phyllomedusidae	Agalychnis_spurrelli	CytB	EF125033
Phyllomedusidae	Cruziohyla_calcarifer	CytB	EF125034

## Sheet: Partitions&Models
Subset	Partition names	Best Model	bp
1	12s	GTR	1184
2	trnaVal	K81	73
3	16s	GTR	1700
4	trnaLeu	TN93	79
5	nd1_pos1	TIM	321
6	nd1_pos2	HKY	320
7	nd1_pos3	TN93	320
8	trnaIle	TN93	73
9	cytb_pos2	TN93	384
10	cytb_pos3	TN93	384
11	cytb_pos1	TN93	383
12	cxcr4_pos1	TN93	254
13	cxcr4_pos2	TVM	254
14	cxcr4_pos3	TN93	254
15	pomc_pos3	TVM	258
16	pomc_pos1	K81	257
17	pomc_pos2	TN93	257
18	rag1_pos1	TN93	150
19	rag1_pos2	TN93	150
20	rag1_pos3	HKY	150
21	rhod_pos3	TN93	111
22	rhod_pos1	TIM	111
23	rhod_pos2	TVM	111
24	siah_pos2	TN93	171
25	siah_pos3	HKY	170
26	siah_pos1	TN93	170
27	tyr_pos3	TN93	204
28	tyr_pos1	K81	204
29	tyr_pos2	K81	203

## Sheet: GeogFile
	geogfn	A	B	C	D	E	F	G	H	I	J	K	L	Remarks about GBIF dataset regarding existing literature (see Reference)	Reference
Agalychnis_annae	100000000000	1	0	0	0	0	0	0	0	0	0	0	0		Hidalgo-Mora et al. (2021), Köhler (2011), Frost (2024), Urbina-Cardona & Loyola (2020)
Agalychnis_callidryas	100000000000	1	0	0	0	0	0	0	0	0	0	0	0		Robertson et al. (2008), Köhler (2011), Frost (2024)
Agalychnis_dacnicolor	100000000000	1	0	0	0	0	0	0	0	0	0	0	0		Lares et al. (2013), Köhler (2011), Frost (2024)
Agalychnis_hulli	010000000000	0	1	0	0	0	0	0	0	0	0	0	0	Not considered to be in C.	Frost (2024), Duellman & Mendelson (1995)
Agalychnis_lemur	100000000000	1	0	0	0	0	0	0	0	0	0	0	0		Köhler (2011), Frost (2024)
Agalychnis_moreletii	100000000000	1	0	0	0	0	0	0	0	0	0	0	0		Urbina-Cardona & Loyola (2020), Köhler (2011), Frost (2024)
Agalychnis_saltator	100000000000	1	0	0	0	0	0	0	0	0	0	0	0		Köhler (2011), Frost (2024), Travers et al. (2011)
Agalychnis_spurrelli	100000000000	1	0	0	0	0	0	0	0	0	0	0	0	Not considered to be in B and C.	Ortega-Andrade (2008), Köhler (2011), Frost (2024)
Agalychnis_terranova	110000000000	1	1	0	0	0	0	0	0	0	0	0	0		Solano et al. (2022), Chaves-Portilla et al. (2021), Palacios (2016), Frost (2024)
Callimedusa_atelopoides	001000000000	0	0	1	0	0	0	0	0	0	0	0	0		Peloso et al., (2009), Fraga et al. (2014), Frost (2024)
Callimedusa_baltea	010000000000	0	1	0	0	0	0	0	0	0	0	0	0		Frost (2024)
Callimedusa_duellmani	010000000000	0	1	0	0	0	0	0	0	0	0	0	0		Frost (2024)
Callimedusa_ecuatoriana	010000000000	0	1	0	0	0	0	0	0	0	0	0	0		Frost (2024)
Callimedusa_perinesos	010000000000	0	1	0	0	0	0	0	0	0	0	0	0		Frost (2024)
Callimedusa_tomopterna	011110000000	0	1	1	1	1	0	0	0	0	0	0	0		Frost(2023)
Cruziohyla_calcarifer	100000000000	1	0	0	0	0	0	0	0	0	0	0	0		Köhler (2011), Frost (2024)
Cruziohyla_craspedopus	001000000000	0	0	1	0	0	0	0	0	0	0	0	0	Not considered to be in B.	Venacio et al. (2014), Frost (2024)
Cruziohyla_sylviae	100000000000	1	0	0	0	0	0	0	0	0	0	0	0		Gray (2018), Frost (2024)
Hylomantis_aspera	000000010000	0	0	0	0	0	0	0	1	0	0	0	0		Pimenta et al. (2007)
Hylomantis_granulosa	000000010000	0	0	0	0	0	0	0	1	0	0	0	0		Almeida et al. (2016)	Moura et al. (2011)
Litoria_freycineti	000000000001	0	0	0	0	0	0	0	0	0	0	0	1		Frost (2024)
Litoria_inermis	000000000001	0	0	0	0	0	0	0	0	0	0	0	1		Frost (2024)
Litoria_meiriana	000000000001	0	0	0	0	0	0	0	0	0	0	0	1		Frost (2024)
Litoria_rubella	000000000001	0	0	0	0	0	0	0	0	0	0	0	1		Frost (2024)
Litoria_rubella	000000000001	0	0	0	0	0	0	0	0	0	0	0	1		Frost (2024)
Nyctimystes_foricula	000000000001	0	0	0	0	0	0	0	0	0	0	0	1		Frost (2024)
Nyctimystes_infrafrenatus	000000000001	0	0	0	0	0	0	0	0	0	0	0	1		Frost (2024)
Nyctimystes_kubori	000000000001	0	0	0	0	0	0	0	0	0	0	0	1		Frost (2024)
Nyctimystes_narinosus	000000000001	0	0	0	0	0	0	0	0	0	0	0	1		Frost (2024)
Nyctimystes_pulcher	000000000001	0	0	0	0	0	0	0	0	0	0	0	1		Frost (2024)
Phasmahyla_cochranae	000000101000	0	0	0	0	0	0	1	0	1	0	0	0	Considered to be in G.	Pereira et al. (2018)
Phasmahyla_cruzi	000000001000	0	0	0	0	0	0	0	0	1	0	0	0		Pereira et al. (2018)
Phasmahyla_exilis	000000010000	0	0	0	0	0	0	0	1	0	0	0	0		Pereira et al. (2018)
Phasmahyla_guttata	000000001000	0	0	0	0	0	0	0	0	1	0	0	0		Pereira et al. (2018)	Lopes et al. (2021)
Phasmahyla_jandaia	000000100000	0	0	0	0	0	0	1	0	0	0	0	0		Pereira et al. (2018)
Phasmahyla_lisbella	000000010000	0	0	0	0	0	0	0	1	0	0	0	0		Pereira et al. (2018)	Oliveira et al. (2021)
Phasmahyla_spectabilis	000000010000	0	0	0	0	0	0	0	1	0	0	0	0		Dias et al. (2011)	Barth et al. (2014)	Pereira et al. (2018)
Phrynomedusa_appendiculata	000000001100	0	0	0	0	0	0	0	0	1	1	0	0	Considered to be in J.	Baêta et al. (2016)
Phrynomedusa_dryade	000000001000	0	0	0	0	0	0	0	0	1	0	0	0		Baêta et al. (2016)
Phrynomedusa_marginata	000000010000	0	0	0	0	0	0	0	1	0	0	0	0	Not considered to be in E and I.	Baêta et al. (2016)
Phyllomedusa_bahiana	000010010000	0	0	0	0	1	0	0	1	0	0	0	0		Brunes et al. (2014)
Phyllomedusa_bicolor	001110000000	0	0	1	1	1	0	0	0	0	0	0	0	Considered to be in E.	Mota et al. (2020)
Phyllomedusa_boliviana	001000100010	0	0	1	0	0	0	1	0	0	0	1	0	Considered to be in G.	de Jesus Rodrigues et al. (2012)	Boulhessen et al. (2023)
Phyllomedusa_burmeisteri	000000111100	0	0	0	0	0	0	1	1	1	1	0	0		Brunes et al. (2014)
Phyllomedusa_camba	000010100000	0	0	0	0	1	0	1	0	0	0	0	0	Considered to be in G and not considered to be in C.	Santos et al. (2012)
Phyllomedusa_chaparroi	010000000000	0	1	0	0	0	0	0	0	0	0	0	0	Not considered to be in C.	Castroviejo-Fisher et al. (2017)
Phyllomedusa_distincta	000000001000	0	0	0	0	0	0	0	0	1	0	0	0	Not considered to be in J.	Brunes et al. (2015)
Phyllomedusa_iheringii	000000000010	0	0	0	0	0	0	0	0	0	0	1	0	Not considered to be in J.	Maneyro & Carreira (2012)
Phyllomedusa_neildi	000100000000	0	0	0	1	0	0	0	0	0	0	0	0		Barrios-Amorós et al. (2019)
Phyllomedusa_sauvagii	000000100010	0	0	0	0	0	0	1	0	0	0	1	0	Considered to be in G.	Ponssa et al. (2020)
Phyllomedusa_tarsius	011100000000	0	1	1	1	0	0	0	0	0	0	0	0		Forlani et al. (2012)
Phyllomedusa_tetraploidea	000000101100	0	0	0	0	0	0	1	0	1	1	0	0	Considered to be in G.	Tayar et al. (2019)
Phyllomedusa_trinitatis	000100000000	0	0	0	1	0	0	0	0	0	0	0	0		Downie et al. (2013)
Phyllomedusa_vaillantii	011110000000	0	1	1	1	1	0	0	0	0	0	0	0		Freitas et al. (2014)
Phyllomedusa_venusta	110000000000	1	1	0	0	0	0	0	0	0	0	0	0	Considered to be in A.	Acosta-Galvis et al. (2006)
Pithecopus_araguaius	000110100000	0	0	0	1	1	0	1	0	0	0	0	0	Considered to be in E and D.	Magalhães et al. (2024)
Pithecopus_ayeaye	000000101000	0	0	0	0	0	0	1	0	1	0	0	0	Not considered to be in H and considered to be in G.	Magalhães et al. (2017)
Pithecopus_azureus	000000100110	0	0	0	0	0	0	1	0	0	1	1	0	Not considered to be in E.	Silva et al. (2021)	Bruschi et al. (2013)
Pithecopus_centralis	000000100000	0	0	0	0	0	0	1	0	0	0	0	0		Magalhães et al. (2018)
Pithecopus_gonzagai	000001010000	0	0	0	0	0	1	0	1	0	0	0	0		de Andrade et al. (2020)
Pithecopus_hypochondrialis	000110100010	0	0	0	1	1	0	1	0	0	0	1	0	Not considered to be in B and K.	Magalhães et al. (2024)
Pithecopus_megacephalus	000000100000	0	0	0	0	0	0	1	0	0	0	0	0	Not considered to be in H.	Ramos et al. (2019)
Pithecopus_nordestinus	000001110000	0	0	0	0	0	1	1	1	0	0	0	0	Considered to be in F and G.	Da Silva et al. (2020)	Röhr et al. (2020)
Pithecopus_oreades	000000100000	0	0	0	0	0	0	1	0	0	0	0	0		Vaz-Silva et al. (2020)	Röhr et al. (2020)	Magalhães et al. (2018)
Pithecopus_palliatus	001000000000	0	0	1	0	0	0	0	0	0	0	0	0		Villacampa-Ortega et al. (2017)
Pithecopus_rohdei	000000001000	0	0	0	0	0	0	0	0	1	0	0	0	Not considered to be in H.	Ramos et al. (2019)
Pithecopus_rusticus	000000000100	0	0	0	0	0	0	0	0	0	1	0	0		Bruschi et al. (2014)
Ranoidea_alboguttata	000000000001	0	0	0	0	0	0	0	0	0	0	0	1		Frost (2024)
Ranoidea_aurea	000000000001	0	0	0	0	0	0	0	0	0	0	0	1		Frost (2024)
Ranoidea_australis	000000000001	0	0	0	0	0	0	0	0	0	0	0	1		Frost (2024)
Ranoidea_brevipes	000000000001	0	0	0	0	0	0	0	0	0	0	0	1		Frost (2024)
Ranoidea_caerulea	000000000001	0	0	0	0	0	0	0	0	0	0	0	1		Frost (2024)
Ranoidea_dayi	000000000001	0	0	0	0	0	0	0	0	0	0	0	1		Frost (2024)
Ranoidea_genimaculata	000000000001	0	0	0	0	0	0	0	0	0	0	0	1		Frost (2024)
Ranoidea_lesueurii	000000000001	0	0	0	0	0	0	0	0	0	0	0	1		Frost (2024)
Ranoidea_maini	000000000001	0	0	0	0	0	0	0	0	0	0	0	1		Frost (2024)
Ranoidea_manya	000000000001	0	0	0	0	0	0	0	0	0	0	0	1		Frost (2024)
Ranoidea_nannotis	000000000001	0	0	0	0	0	0	0	0	0	0	0	1		Frost (2024)
Bibliography
Aguilar CA, Rojas-Padilla O, Rios-Alva EJ, Odicio-Iglesias MM, Aguilar-Manihuari R, Gagliardi-Urrutia G. 2022. Updated checklist of the amphibians from Loreto Department.
Bruschi, D. P., E. M. Lucas, P. C. de A. Garcia, and S. M. Recco-Pimentel. 2014. Molecular and morphological evidence reveals a new species in the Phyllomedusa hypochondrialis group (Hylidae, Phyllomedusinae) from the Atlantic Forest of the highlands of southern Brazil. PLoS (Public Library of Science) One 9 (8: e105608): 1–13.
Chaves-Portilla GA, Rueda-Solano LA, Daza JM. 2021. First record of Colombian red-eyed tree frog Agalychnis terranova from the Sierra Nevada de Santa Marta, Colombia with a description of its advertisement call. Herpetol Bull 156:23–27.
Duellman WE, Mendelson JR. 1995. Amphibians and reptiles from northern Departamento Loreto, Peru: taxonomy and biogeography. The University of Kansas Science Bulletin 55:329–376.
Fraga R de, Ferrão M, Carvalho VT de. 2014. Geographic range extension of the toad leaf frog Phyllomedusa atelopoides Duellman, Cadle and Cannatella, 1988 (Anura, Hylidae). Volume 7, Pags. 203-205.
Frost DR. 2024.Amphibian Species of the World: an Online Reference. Version 6.2. DOI: doi.org/10.5531/db.vz.0001.
Gray AR. 2018. Review of the genus Cruziohyla (Anura: Phyllomedusidae), with description of a new species. Zootaxa 4450:401–426.
Hidalgo-Mora E, Valverde-Castillo A, Alvarado JGA. 2021. Range extension of the Blue-Sided Leaf Frog, Agalychnis annae (Anura: Hylidae): Using citizen science across suburban areas in Costa Rica. Reptiles & Amphibians 28:264–267.
Köhler G. 2011. Amphibians of Central America. Offenbach, Germany: Herpeton.
Lares RV, Martínez RM, Gadsden H, León GA, Gaytán GC, Trápaga RG. 2013. Checklist of amphibians and reptiles of the state of Durango, México. Check List 9:714–724.
Ortega-Andrade HM. 2008. Agalychnis spurrelli Boulenger (Anura, Hylidae): variación, distribución y sinonimia. Papéis Avulsos de Zoologia 48:103–117.
Palacios P. 2016. First record and distribution extension of Agalychnis terranova (Rivera-Correa, Duarte-Cubides, Rueda-Almonacid & Daza, 2013)(Anura: Hylidae: Phyllomedusinae) in the Pacific lowlands of Colombia. Herpetology Notes 9:109–111.
Peloso PLV, Sturaro MJ, Maschio GF, Rodrigues FS, Prudente ALC. 2009. New records and distribution of the Toady leaf frog Phyllomedusa atelopoides (Anura, Hylidae). Herpetology Notes 2:59–62.
Ramos, E. K. S., de Magalhaes, R. F., Marques, N. C. S., Baeta, D., Garcia, P. C. A., & Santos, F. R. (2019). Cryptic diversity in Brazilian endemic monkey frogs (Hylidae, Phyllomedusinae, Pithecopus) revealed by multispecies coalescent and integrative approaches. Molecular Phylogenetics and Evolution, 132, 105-116.
Robertson JM, Robertson AD. 2008. Spatial and temporal patterns of phenotypic variation in a Neotropical frog. Journal of Biogeography 35:830–843. DOI: https://doi.org/10.1111/j.1365-2699.2007.01824.x.
Solano L, Baleta-Osorio Y, Julio-Dávila J, Vergara-Comas D, González-Genes E. 2022. First record and distribution extension of Agalychnis terranova in the Montes de María, Colombia. BISTUA Revista de la Facultad de Ciencias Básicas 20:9–12.
Travers SL, Townsend JH, Sunyer J, Obando LA, Wilson LD, Nickerson MA. 2011. New and noteworthy records of amphibians and reptiles from Reserva de la Biósfera Bosawas, Nicaragua. Herpetological Review 42:399.
Urbina-Cardona JN, Loyola RD. 2020. Applying niche-based models to predict endangered-hylid potential distributions: are neotropical protected areas effective enough? Tropical Conservation Science 1:417–445. DOI: 10.1177/194008290800100408.
Villacampa-Ortega, J., S. J. Serrano-Rojas, and A. Whitworth. 2017. Amphibians of the Manu Learning Centre and Other Areas of the Manu Region. Cusco, Peru: The Crees Foundation
Vaz-Silva, W., N. M. Maciel, F. Nomura, A. R. de Morais, V. Guerra Batista, D. L. Santos, S. P. de Andrade, A. A. B. de Oliveira, R. A. Brandão, and R. P. Bastos. 2020. Guia de identificação das espécies de anfíbios (Anura e Gymnophiona) do estado de Goiás e do Distrito Federal, Brasil Central. Curitiba, Brazil. https://doi.org/10.7476/9786587590011: Sociedade Brasileira de Zoologia.
Venancio NM, de Moura ALB, Brito TF, de Melo TN, de Souza MB. 2014. First record of Cruziohyla craspedopus (Anura: Hylidae) for the State of Acre, with an updated distribution map. Herpetology Notes 7:479–480.
Röhr, D. L., F. Camurugi, G. B. Paterno, M. C. Gehara, F. A. Juncá, G. F. R. Álvares, R. A. Brandão, and A. A. Garda. 2020. Variability in anuran advertisement call: a multi-level study with 15 species of monkey tree frogs (Anura, Phyllomedusidae). Canadian Journal of Zoology 98: 495–504 (dx.doi.org/10.1139/cjz-2020-0018).
Da Silva, F. P., Fernandes-Ferreira, H., Montes, M. A., & da Silva, L. G. (2020). Distribution modeling applied to deficient data species assessment: A case study with Pithecopus nordestinus (Anura, Phyllomedusidae). Neotropical Biology and Conservation, 15(2), 165-175.
Magalhães, R. F., Ramos, E. K., Bandeira, L. N., Ferreira, J. S., Werneck, F. P., Anciães, M., & Bruschi, D. P. (2024). Integrative species delimitation uncovers hidden diversity within the Pithecopus hypochondrialis species complex (Hylidae, Phyllomedusinae) and its phylogeography reveals Plio-Pleistocene connectivity among Neotropical savannas. Molecular Phylogenetics and Evolution, 190, 107959.
de Andrade, F. S., Haga, I. A., Ferreira, J. S., Recco-Pimentel, S. M., Toledo, L. F., & Bruschi, D. P. (2020). A new cryptic species of Pithecopus (Anura, Phyllomedusidae) in north-eastern Brazil. European Journal of Taxonomy, 723, 108-134.
de Magalhães, R. F., Rocha, P. C., Santos, F. R., Strüssmann, C., & Giaretta, A. A. (2018). Integrative taxonomy helps to assess the extinction risk of anuran species. Journal for Nature Conservation, 45, 1-10.
Silva, G. R., Carvalho, A. T., Ribeiro, F. S., Machado, J., & Couto, N. (2021). Pithecopus azureus (Cope, 1862) in the municipality of Joaquim Pires, Piauí State, northeastern Brazil (Anura, Phyllomedusidae). Herpetology Notes, 14, 121-123.
Bruschi, D.P., Busin, C.S., Toledo, L.F. et al. Evaluation of the taxonomic status of populations assigned to Phyllomedusa hypochondrialis (Anura, Hylidae, Phyllomedusinae) based on molecular, chromosomal, and morphological approach. BMC Genet 14, 70 (2013).
de Magalhães, R. F., Lemes, P., Camargo, A., Oliveira, U., Brandão, R. A., Thomassen, H., ... & Santos, F. R. (2017). Evolutionarily significant units of the critically endangered leaf frog Pithecopus ayeaye (Anura, Phyllomedusidae) are not effectively preserved by the Brazilian protected areas network. Ecology and Evolution, 7(21), 8812-8828.
Acosta-Galvis AR, Huertas-Salgado C, Rada M (2006) Aproximación al conocimiento de los Anfibios en una localidad del Magdalena Medio (Departamento de Caldas, Colombia). Revista de La Academia Colombiana de Ciencias Exactas, Físicas y Naturales 30 (115): 291–301.
Freitas, M. A., Farias, T., Sousa, S. O. E., Vieira, R. S., Moura, G. J. B., & Uhlig, V. (2014). First record of Phyllomedusa vaillantii Boulenger, 1882 (Amphibia: Anura) for the state of Maranhão, Brazil. Herpetology Notes, 7, 457-459.
Downie, J. R., Nokhbatolfoghahai, M., Bruce, D., Smith, J. M., Orthmann-Brask, N., & McDonald-Allan, I. (2013). Nest structure, incubation and hatching in the Trinidadian leaf-frog Phyllomedusa trinitatis. Phyllomedusa, 12(1), 13-32.
Tayar, B., Maffei, F., & Donatelli, R. J. (2019). Ecologia e história natural de Phyllomedusa tetraploidea (Anura: Phyllomedusidae), no interior do Estado de São Paulo, Sudeste do Brasil.
Forlani, M. C., Bernardo, P. H., & Zaher, H. (2012). Amphibia, Anura, Hylidae, Phyllomedusa tarsius Cope, 1868: distribution extension, new country record and geographic distribution map. Check List, 8(1), 155-157.
Ponssa, M. L., Medina, R. G., & Vera Candioti, M. F. (2020). Rana Mono Phyllomedusa Sauvagii.
Barrio-Amorós, C. L., Rojas-Runjaic, F. J. M., & Señaris, J. C. (2019). Catalogue of the amphibians of Venezuela: illustrated and annotated species list, distribution, and conservation. Amphibian & Reptile Conservation, 13(1), 1-198.
Maneyro, R. & S. Carreira (2012): Guía de anfíbios del Uruguay. – Ediciones de la Fuga, Montevideo, 207 pp.
Brunes, T. O., Thomé, M. T. C., Alexandrino, J., Haddad, C. F., & Sequeira, F. (2015). Ancient divergence and recent population expansion in a leaf frog endemic to the southern Brazilian Atlantic forest. Organisms Diversity & Evolution, 15, 695-710.
Castroviejo-Fisher, S., Koehler, J., De La Riva, I., & Padial, J. M. (2017). A new morphologically cryptic species of Phyllomedusa (Anura: Phyllomedusidae) from Amazonian forests of northern Peru revealed by DNA sequences. Zootaxa, 4269(2), 245-264.
de Jesus Rodrigues, D., da Costa Noronha, J., de Morais Lima, M., & Rosa, A. C. (2011). Amphibia, Anura, Hylidae, Phyllomedusa boliviana Boulenger, 1902 and Phyllomedusa camba De la Riva, 2000: Distribution extension in central Brazil. Check List, 7(4), 397-399.
Boullhesen, M., Vaira, M., Barquez, R. M., & Akmentins, M. S. (2023). Patterns of acoustic phenology in an anuran assemblage of the Yungas Andean forests of Argentina. Acta Herpetologica, 18(1), 23-36.
Mota, E. P., Kaefer, I. L., da Silva Nunes, M., Lima, A. P., & Farias, I. P. (2020). Hidden diversity within the broadly distributed Amazonian giant monkey frog (Phyllomedusa bicolor: Phyllomedusidae). Amphibia-Reptilia, 41(3), 349-359.
Brunes, T. O., Alexandrino, J., Baeta, D., Zina, J., Haddad, C. F., & Sequeira, F. (2014). Species limits, phylogeographic and hybridization patterns in Neotropical leaf frogs (Phyllomedusinae). Zoologica Scripta, 43(6), 586-604.
Baêta, D., Giasson, L. O. M., Pombal Jr, J. P., & Haddad, C. F. B. (2016). Review of the rare genus Phrynomedusa Miranda-Ribeiro, 1923 (Anura: Phyllomedusidae) with description of a new species. Herpetological Monographs, 30(1), 49-78.
Barth, A., Vences, M., Solé, M., & Costa, M. A. (2014). Molecular cytogenetics and phylogenetic analysis of Brazilian leaf frog species of the genera Phyllomedusa and Phasmahyla (Hylidae: Phyllomedusinae). Canadian Journal of Zoology, 92(9), 795-802.
Dias, I. R., Roedder, D., Weinsheimer, F., Kwet, A., & Sole, M. (2011). Description of the advertisement call of Phasmahyla spectabilis Cruz, Feio & Nascimento, 2008 (Anura: Phyllomedusinae) with comments on its distribution and reproduction. Zootaxa, 2767(1), 59-64.
Pereira, E. A., Rocha, L. C. L., Folly, H., da Silva, H. R., & Santana, D. J. (2018). A new species of spotted leaf frog, genus Phasmahyla (Amphibia, Phyllomedusidae) from Southeast Brazil. PeerJ, 6, e4900.
Oliveira, J. C., Santos, R. D., Barros, L. P. V., Leite, M., Risse-Quaioto, B., Militão, C. M., ... & Rocha, C. F. D. (2021). Amphibians of Serra das Torres Natural Monument: a reservoir of biodiversity in the Atlantic Forest of southeastern Brazil. Biota Neotropica, 21.
Lopes, C. M., Baêta, D., Valentini, A., Lyra, M. L., Sabbag, A. F., Gasparini, J. L., ... & Zamudio, K. R. (2021). Lost and found: Frogs in a biodiversity hotspot rediscovered with environmental DNA. Molecular Ecology, 30(13), 3289-3298.
Pimenta, B. V., Nunes, I., & Cruz, C. A. G. (2007). Notes on the poorly known phyllomedusine frog Hylomantis aspera Peters, 1872 (Anura, Hylidae). South American Journal of Herpetology, 2(3), 206-214.
Almeida, J.P.F.A., Do Nascimento, F.A.C., Torquato, S., Lisboa, B.S., Tiburcio, I.C.S., Palmeira, C.N.S., De Lima, M.G., Mott, T. (2016): Amphibians of Alagoas State, northeastern Brazil. Herpetological Notes 9: 123–140
